# Supplementary material for: Perioperative Low-Dose Ketamine for Postoperative Pain Management in Spine Surgery: A Systematic Review and Meta-Analysis of Randomized Controlled Trials
Source: PubMed Central journal article supplement (PMC8989618; doi:10.1155/2022/1507097), 2022-03-31
Supplement: 1507097.f1.pdf [file 1507097.f1.pdf]

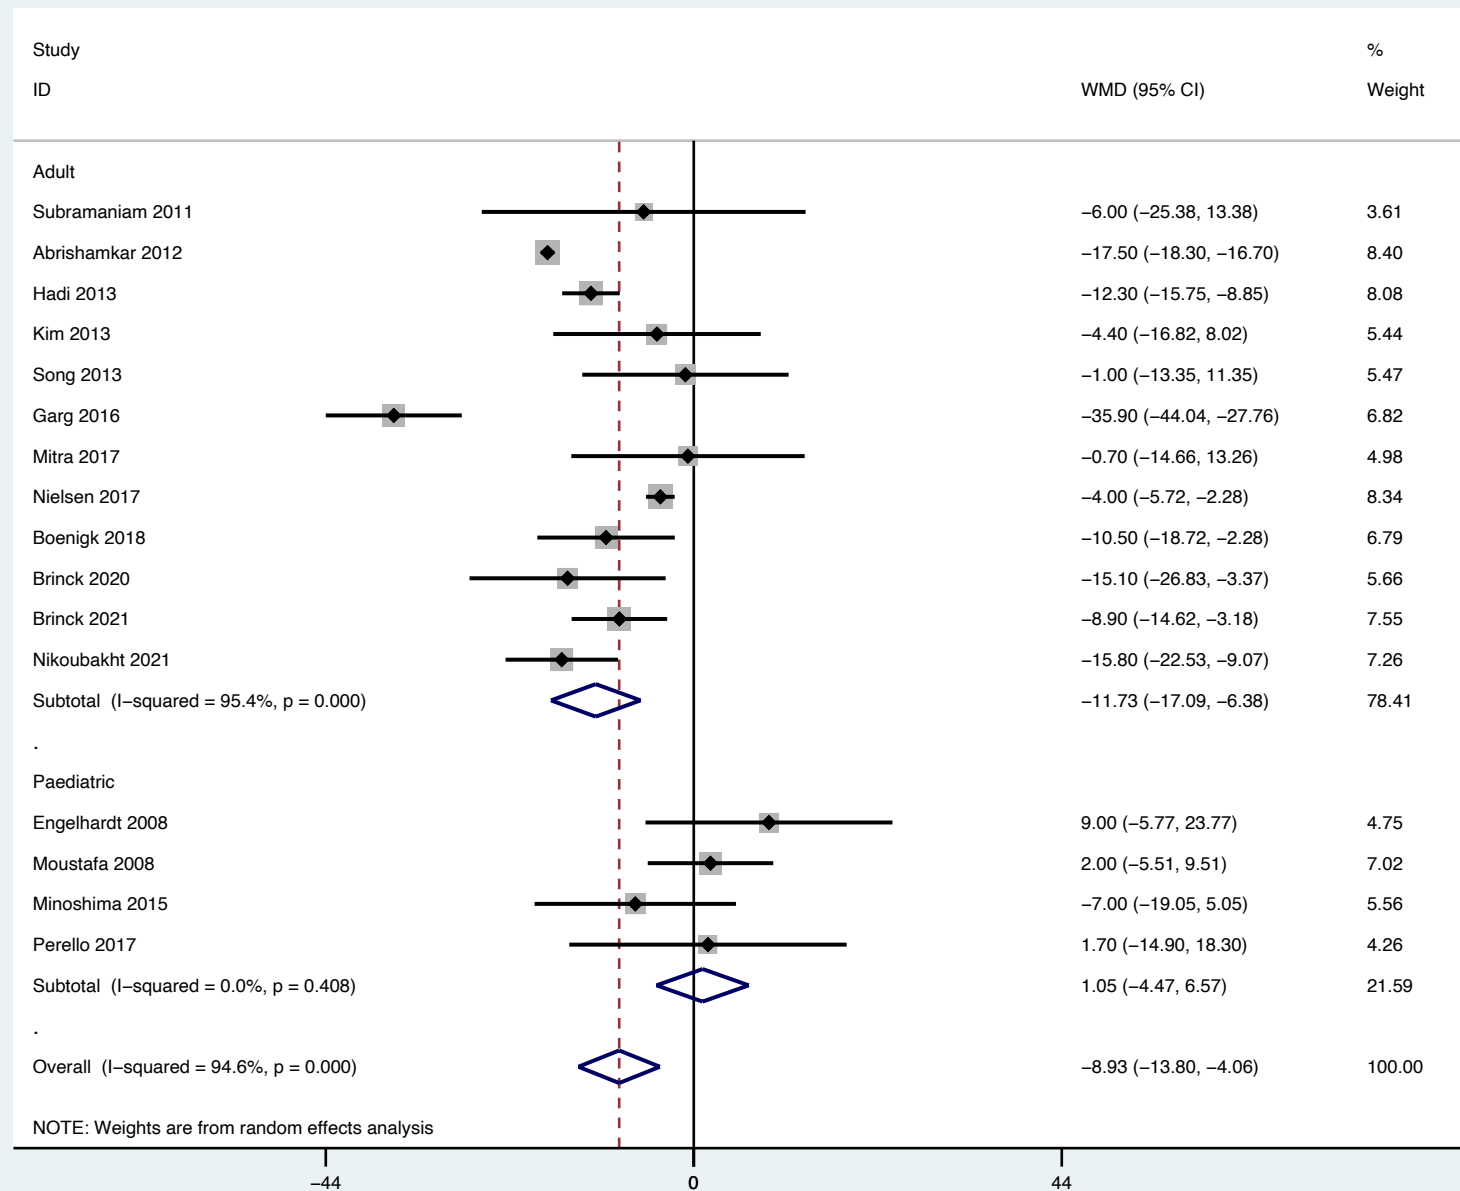

**Figure 1.** Subgroup analysis of pain intensity at rest at 6 h postoperatively by ages

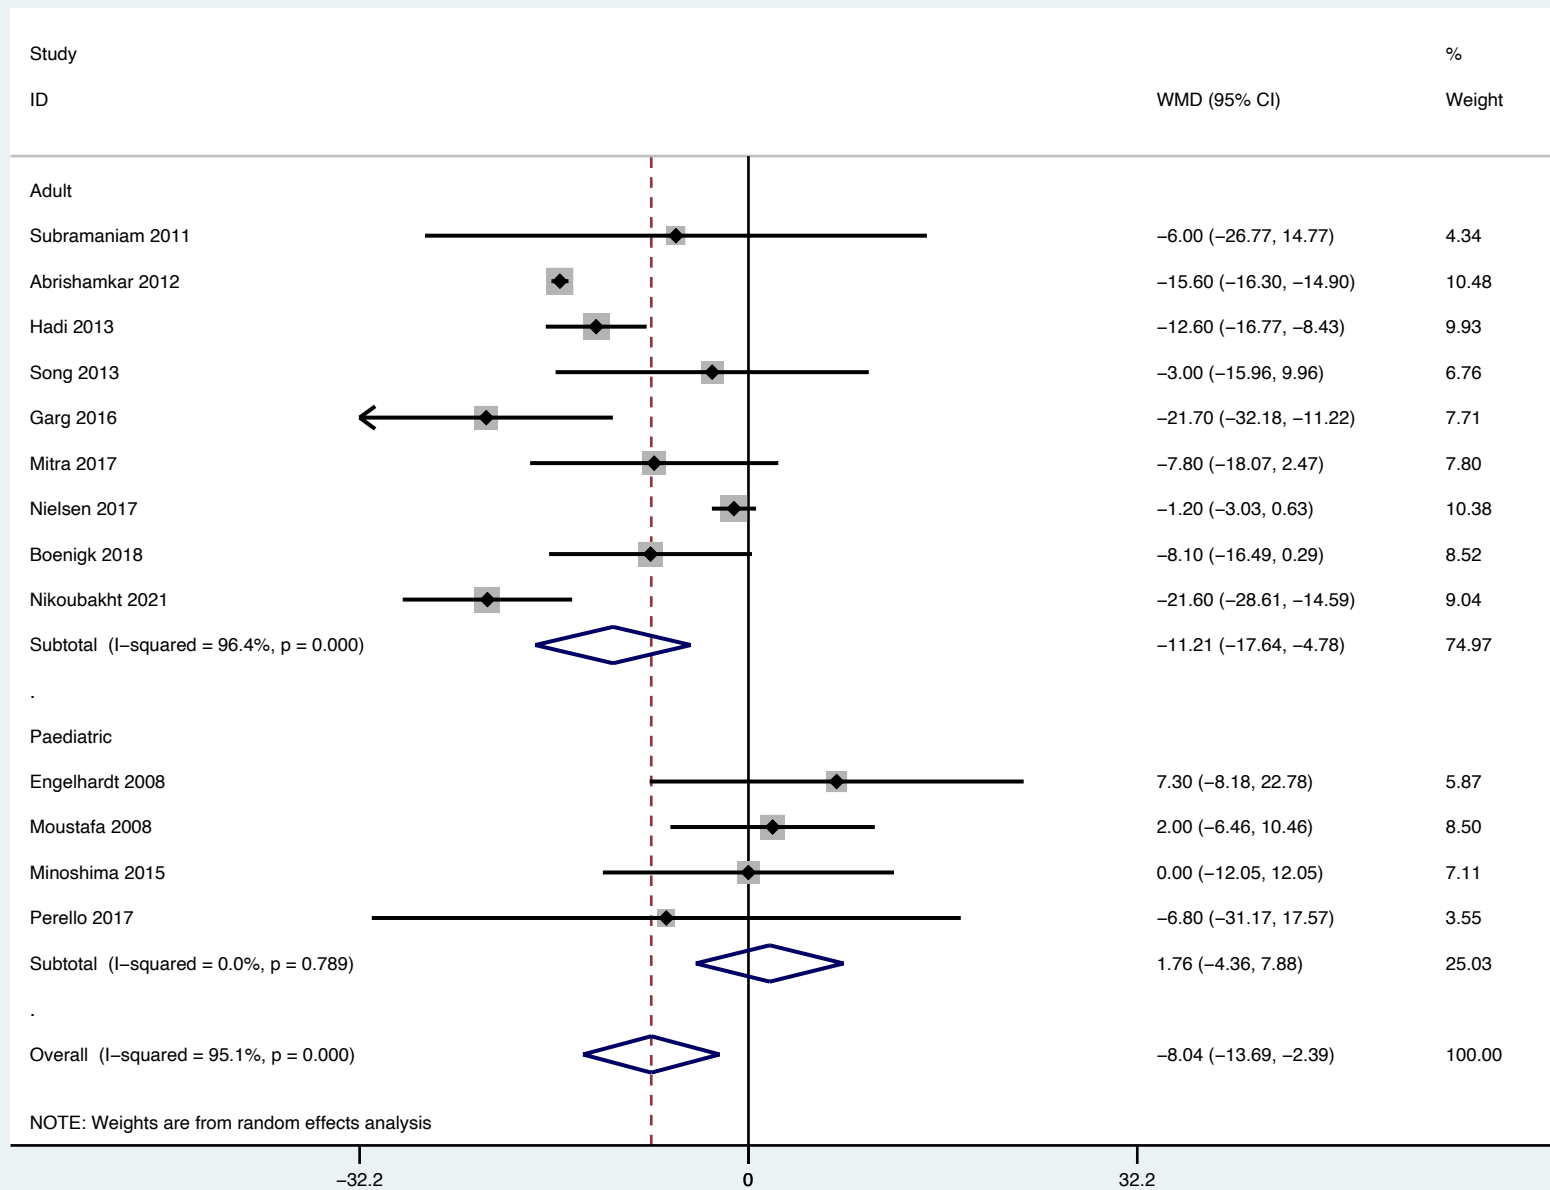

**Figure 2.** Subgroup analysis of pain intensity at rest at 12 h postoperatively by ages

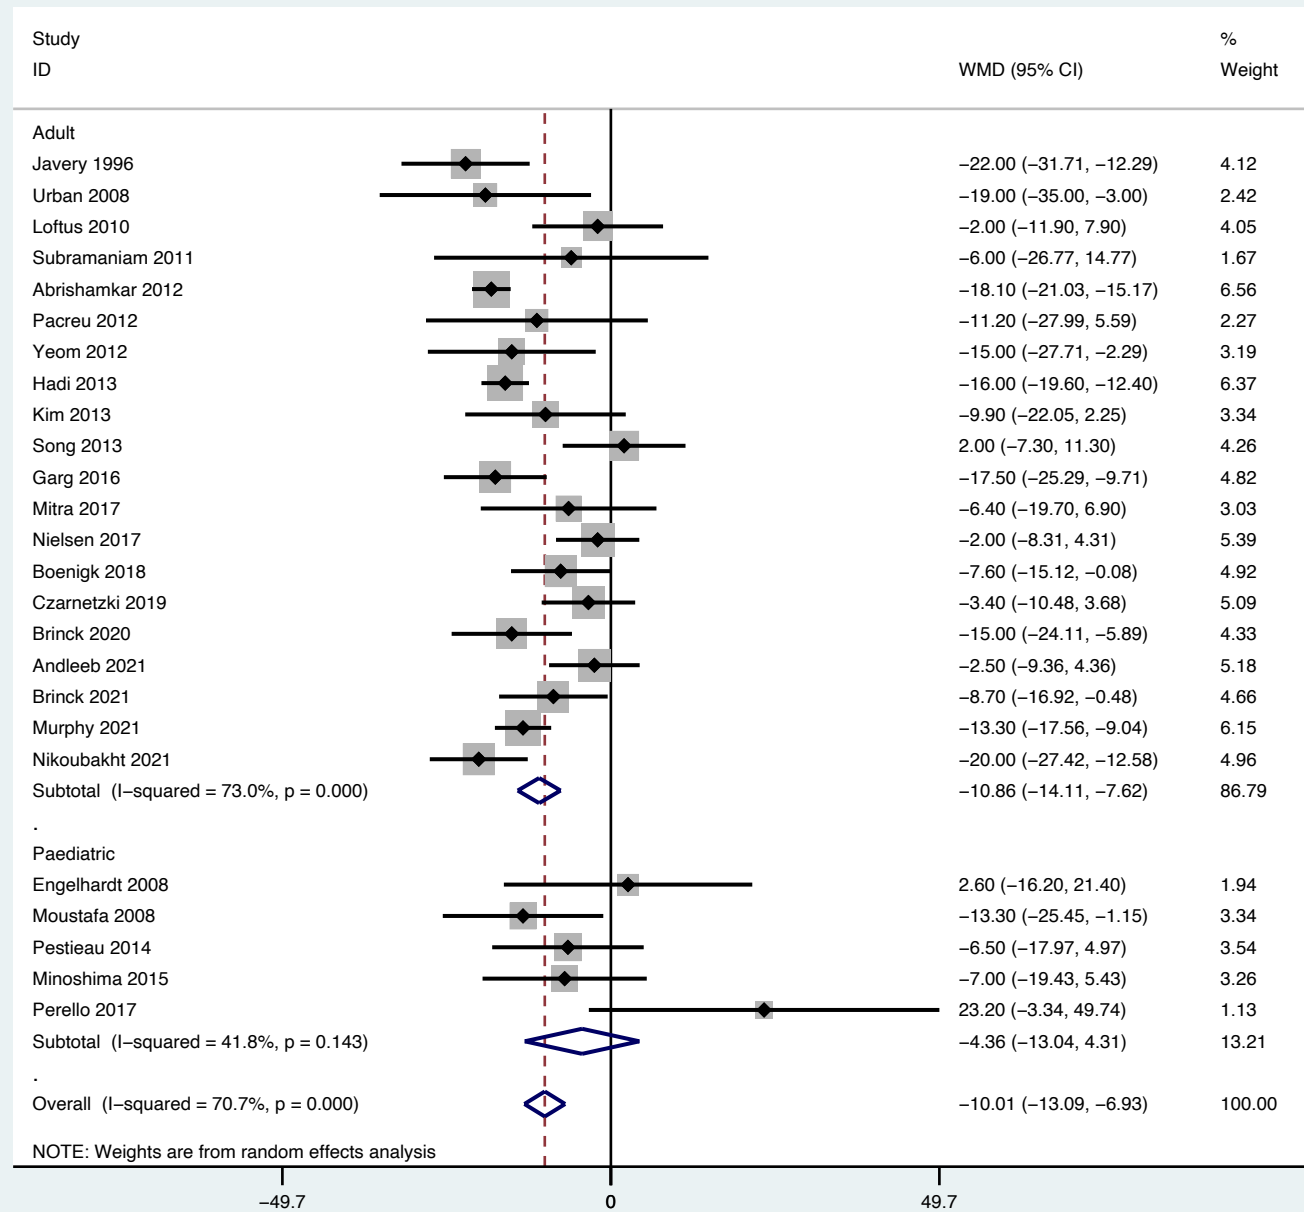

**Figure 3.** Subgroup analysis of pain intensity at rest at 24 h postoperatively by ages

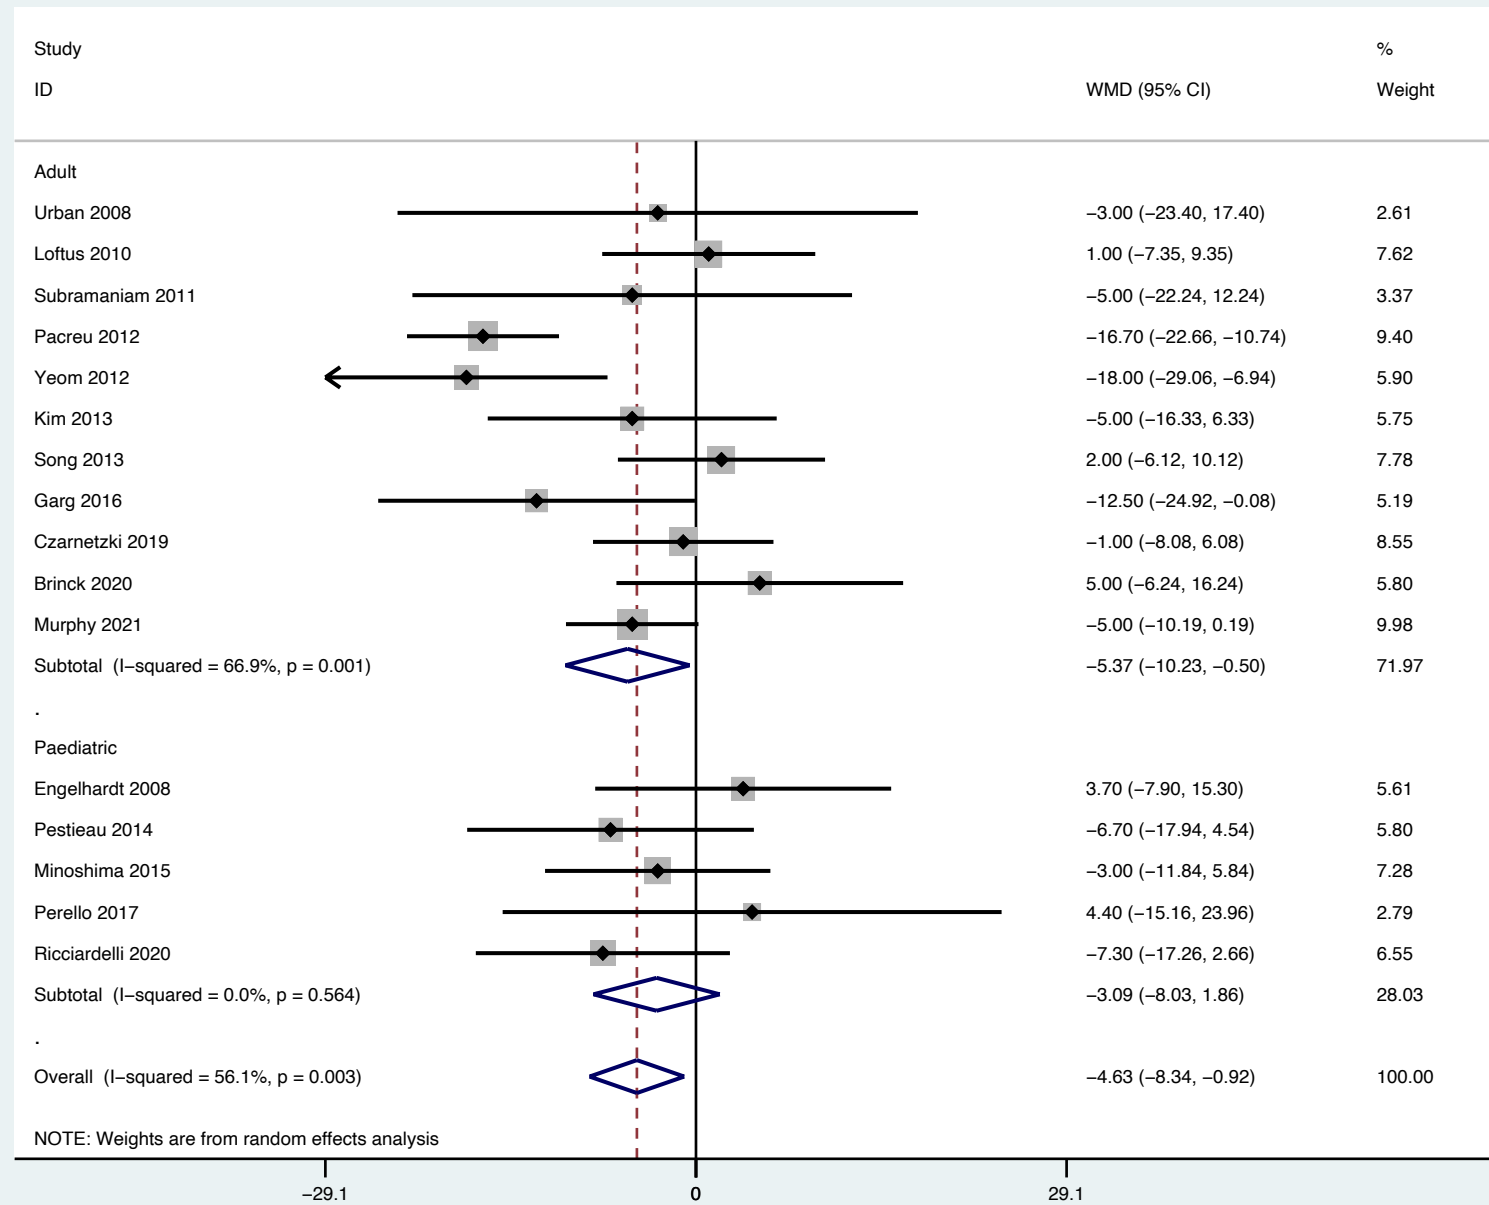

**Figure 4.** Subgroup analysis of pain intensity at rest at 48 h postoperatively by ages

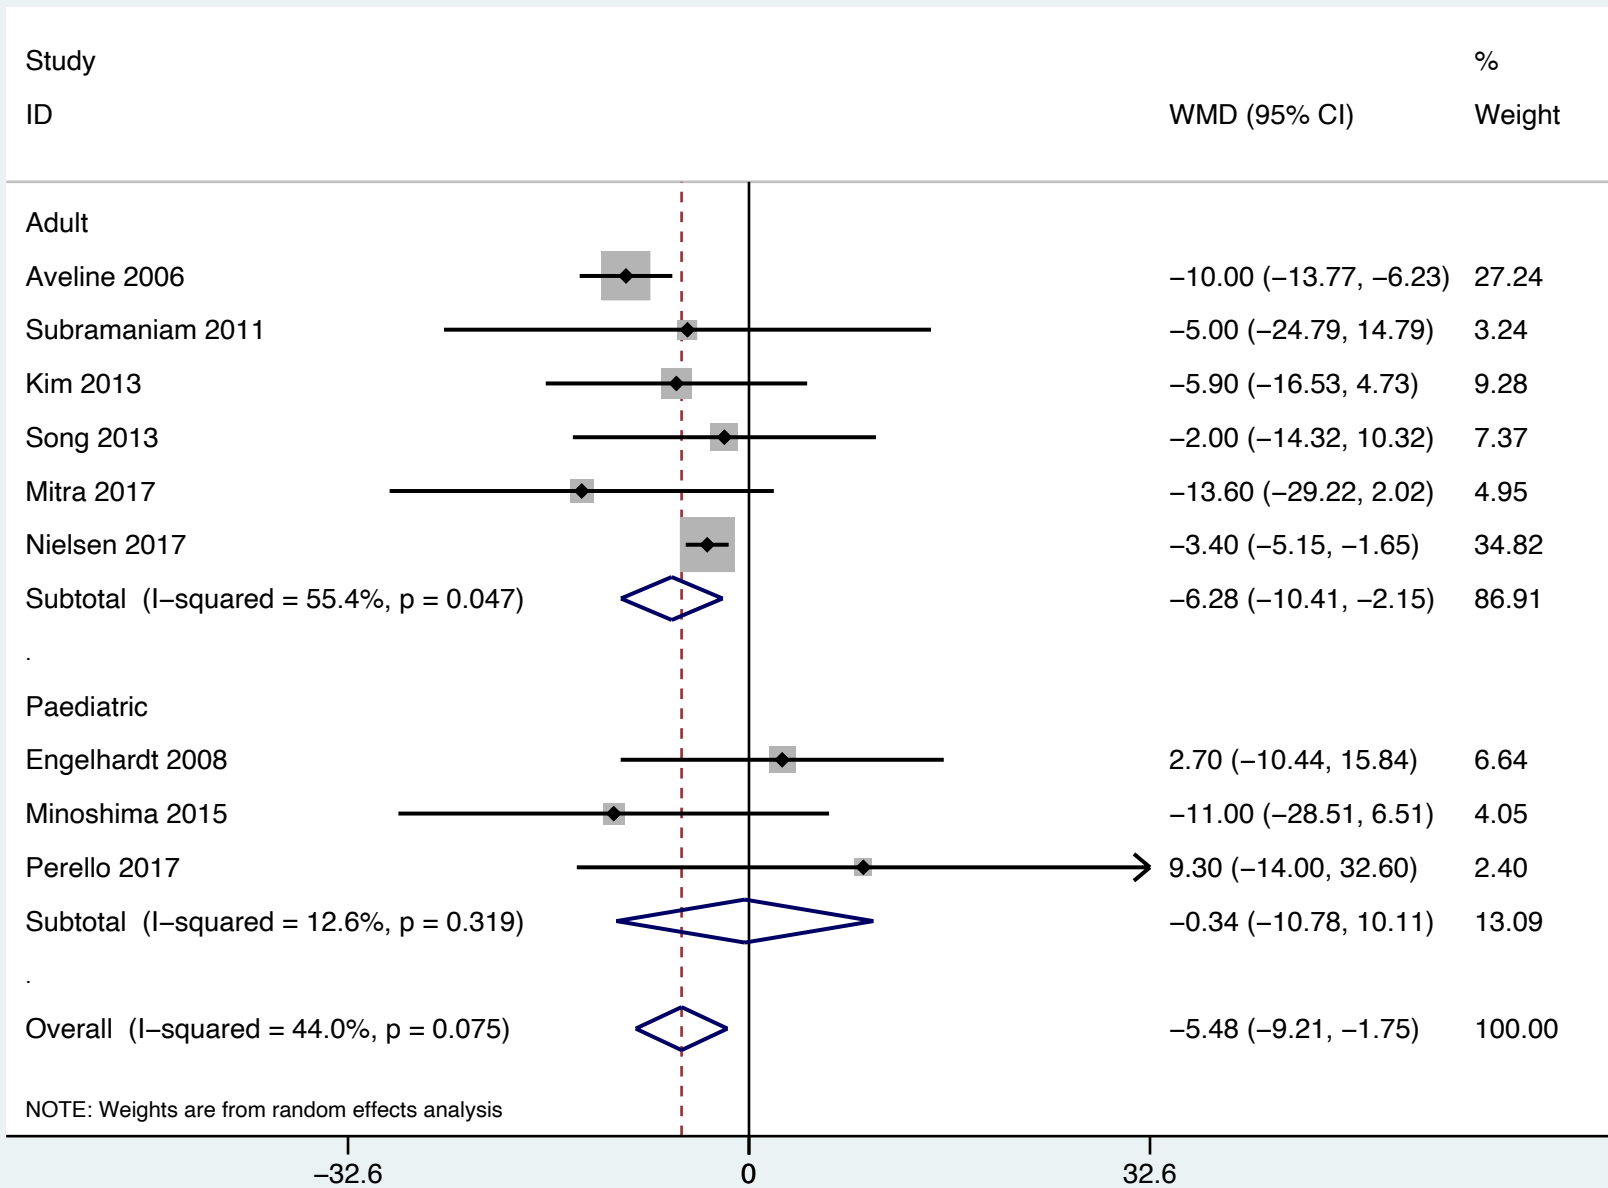

**Figure 5.** Subgroup analysis of pain intensity during mobilization at 6 h postoperatively by ages

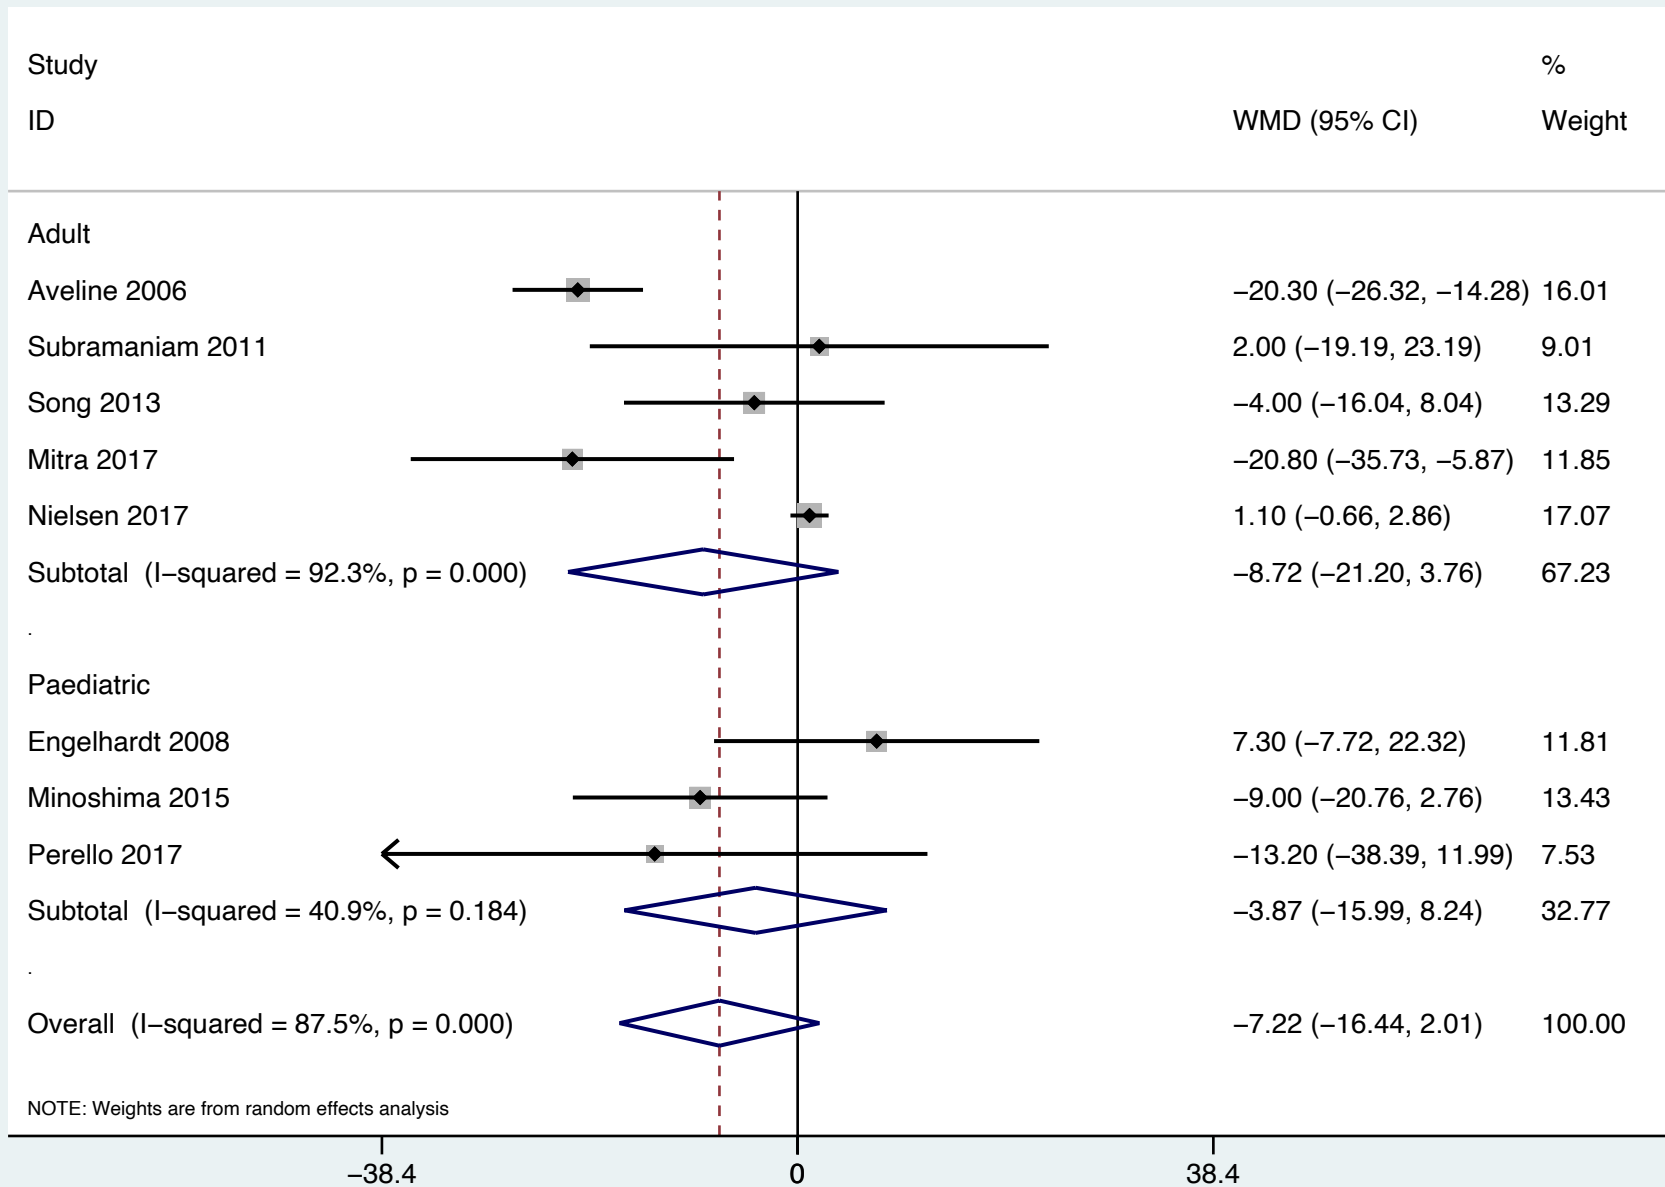

**Figure 6.** Subgroup analysis of pain intensity during mobilization at 12 h postoperatively by ages

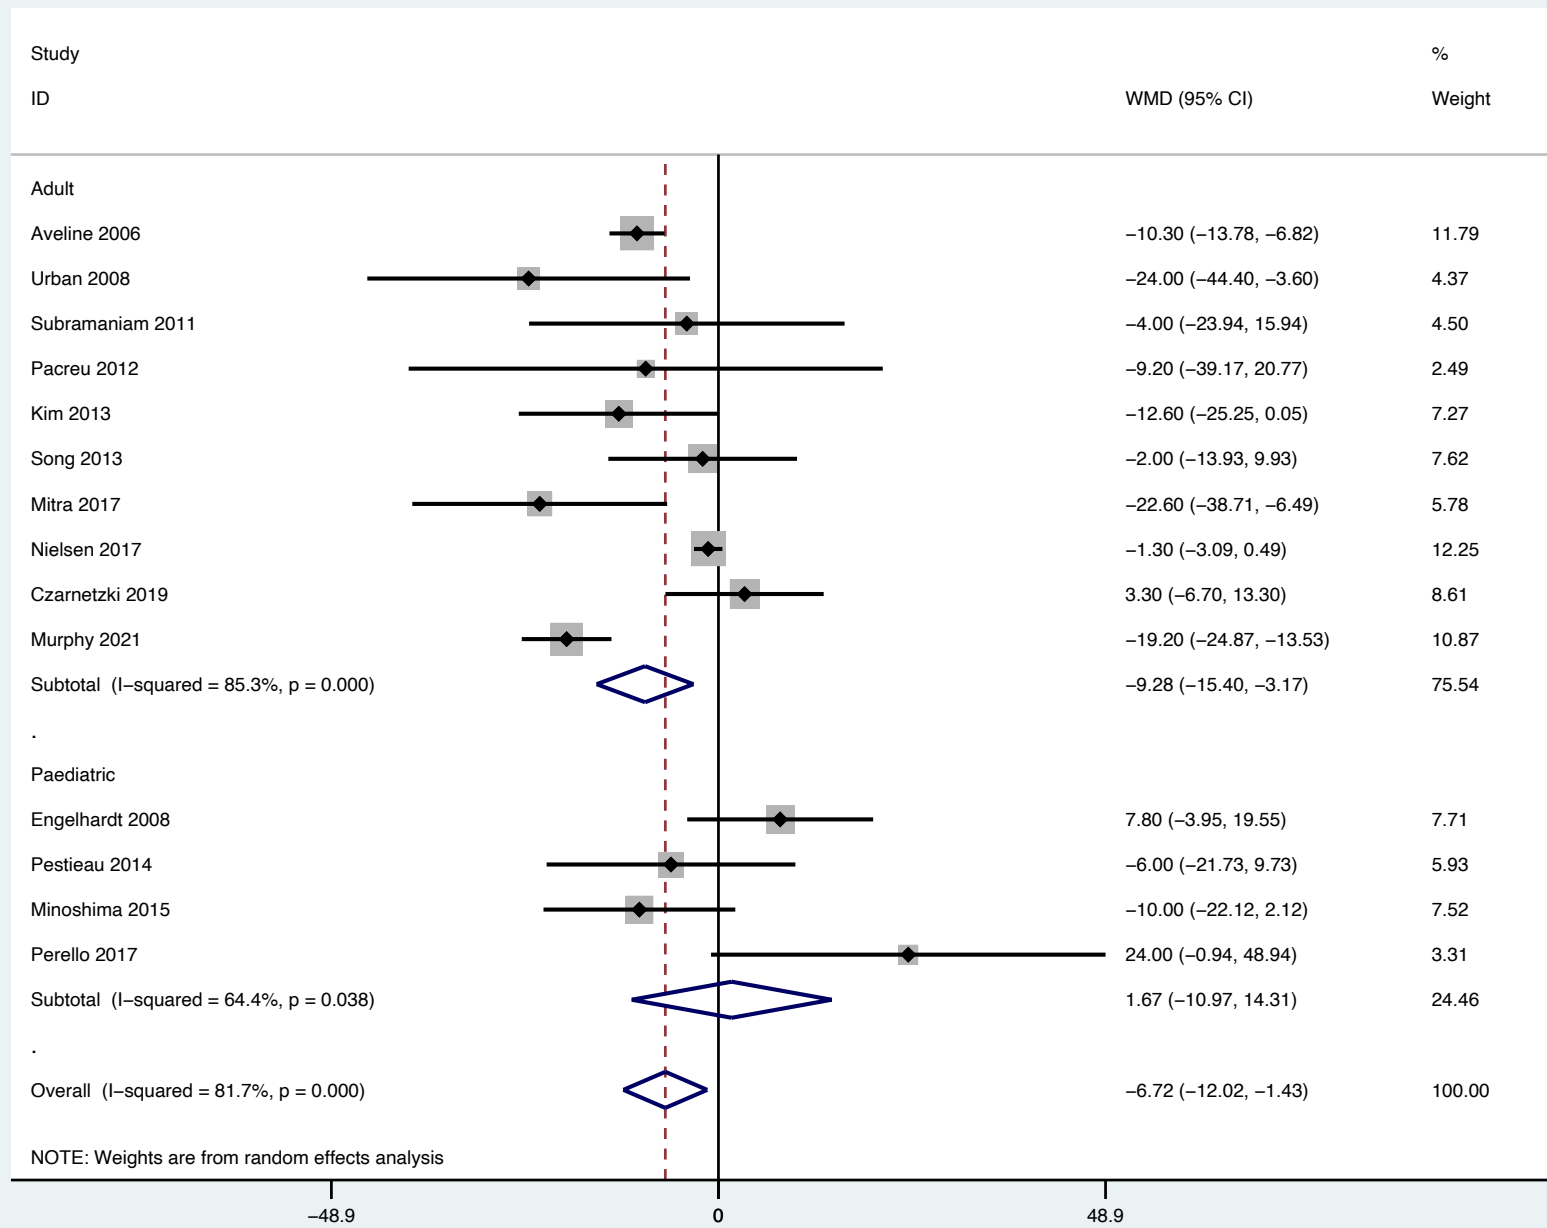

**Figure 7.** Subgroup analysis of pain intensity during mobilization at 24 h postoperatively by ages

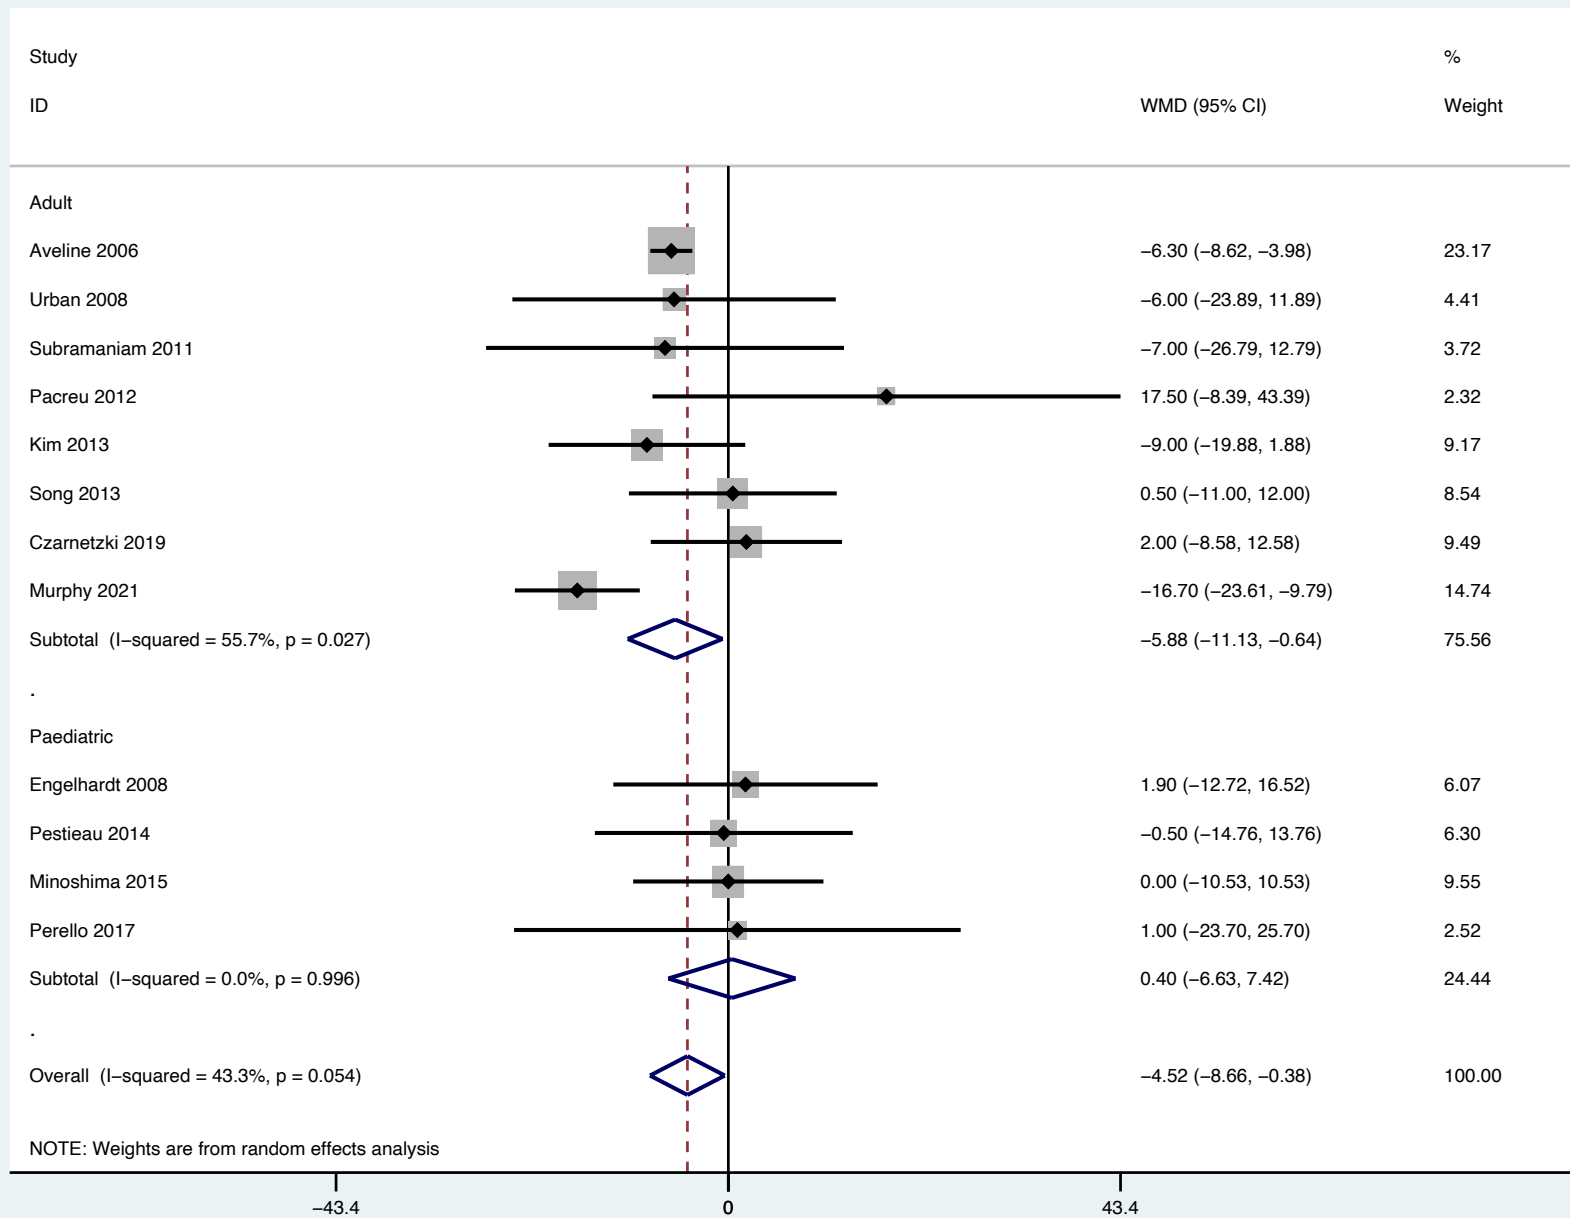

**Figure 8.** Subgroup analysis of pain intensity during mobilization at 48 h postoperatively by ages



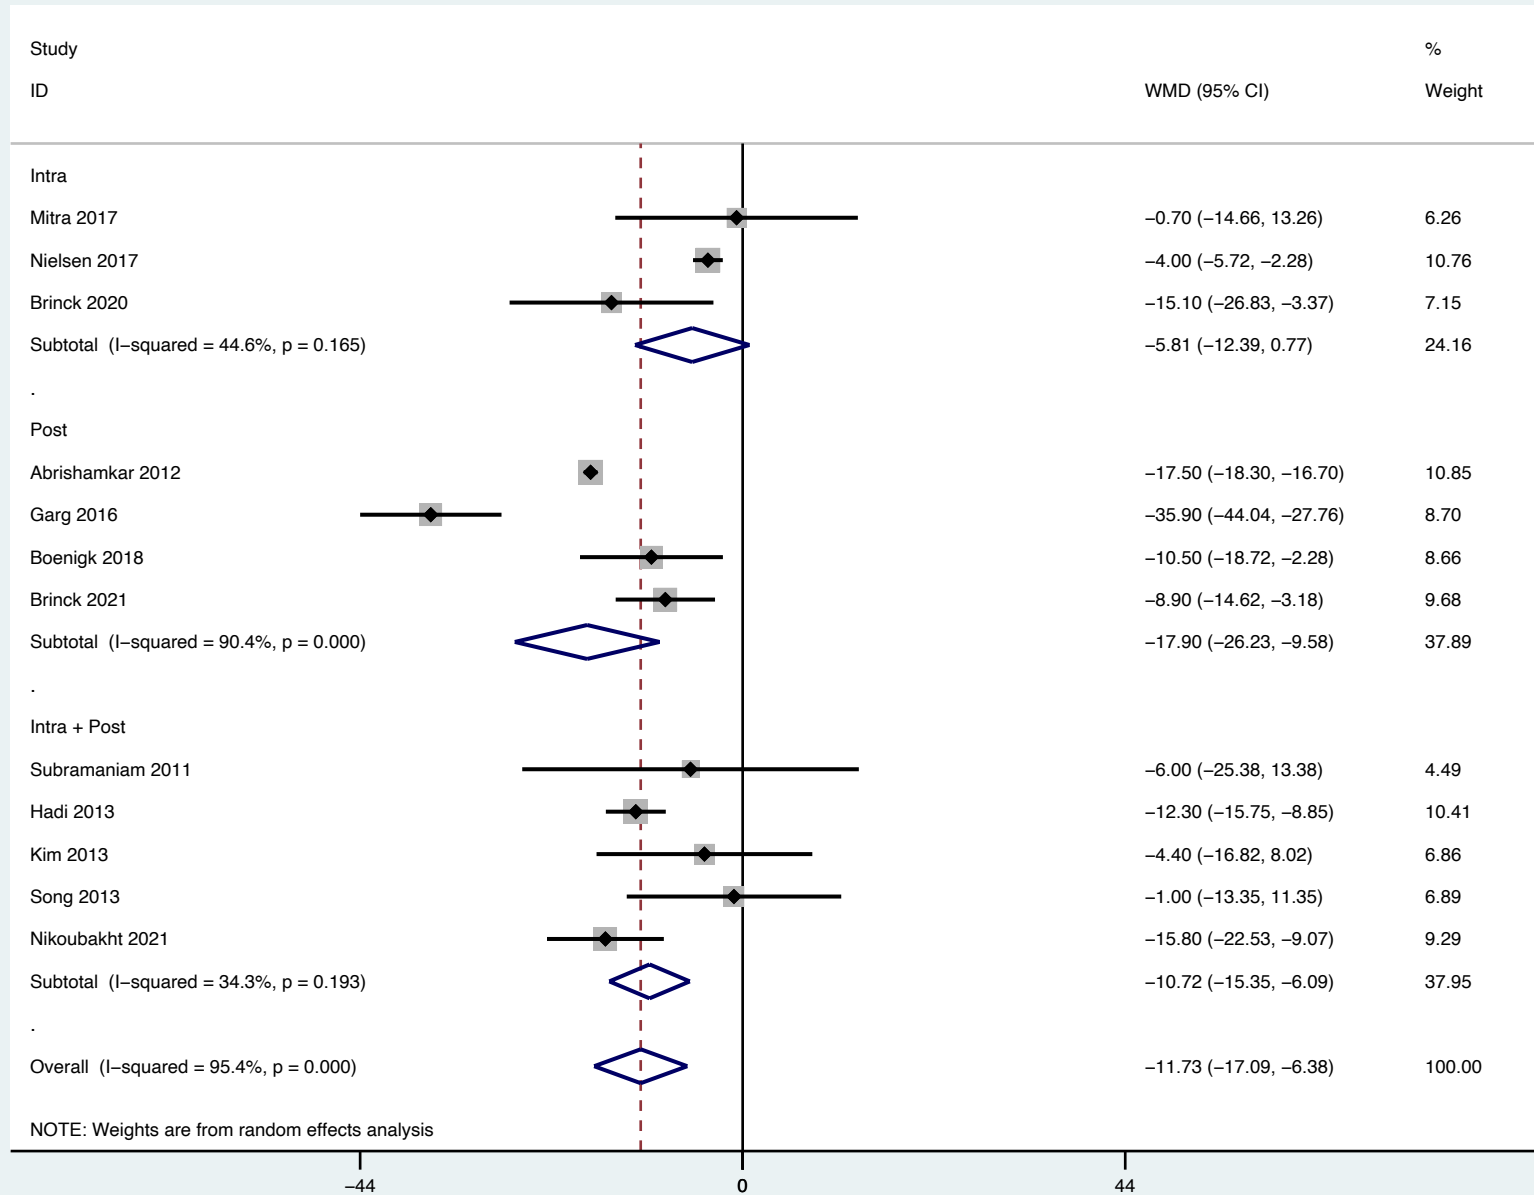

**Figure 9.** Subgroup analysis of pain intensity at rest at 6 h postoperatively by administration times

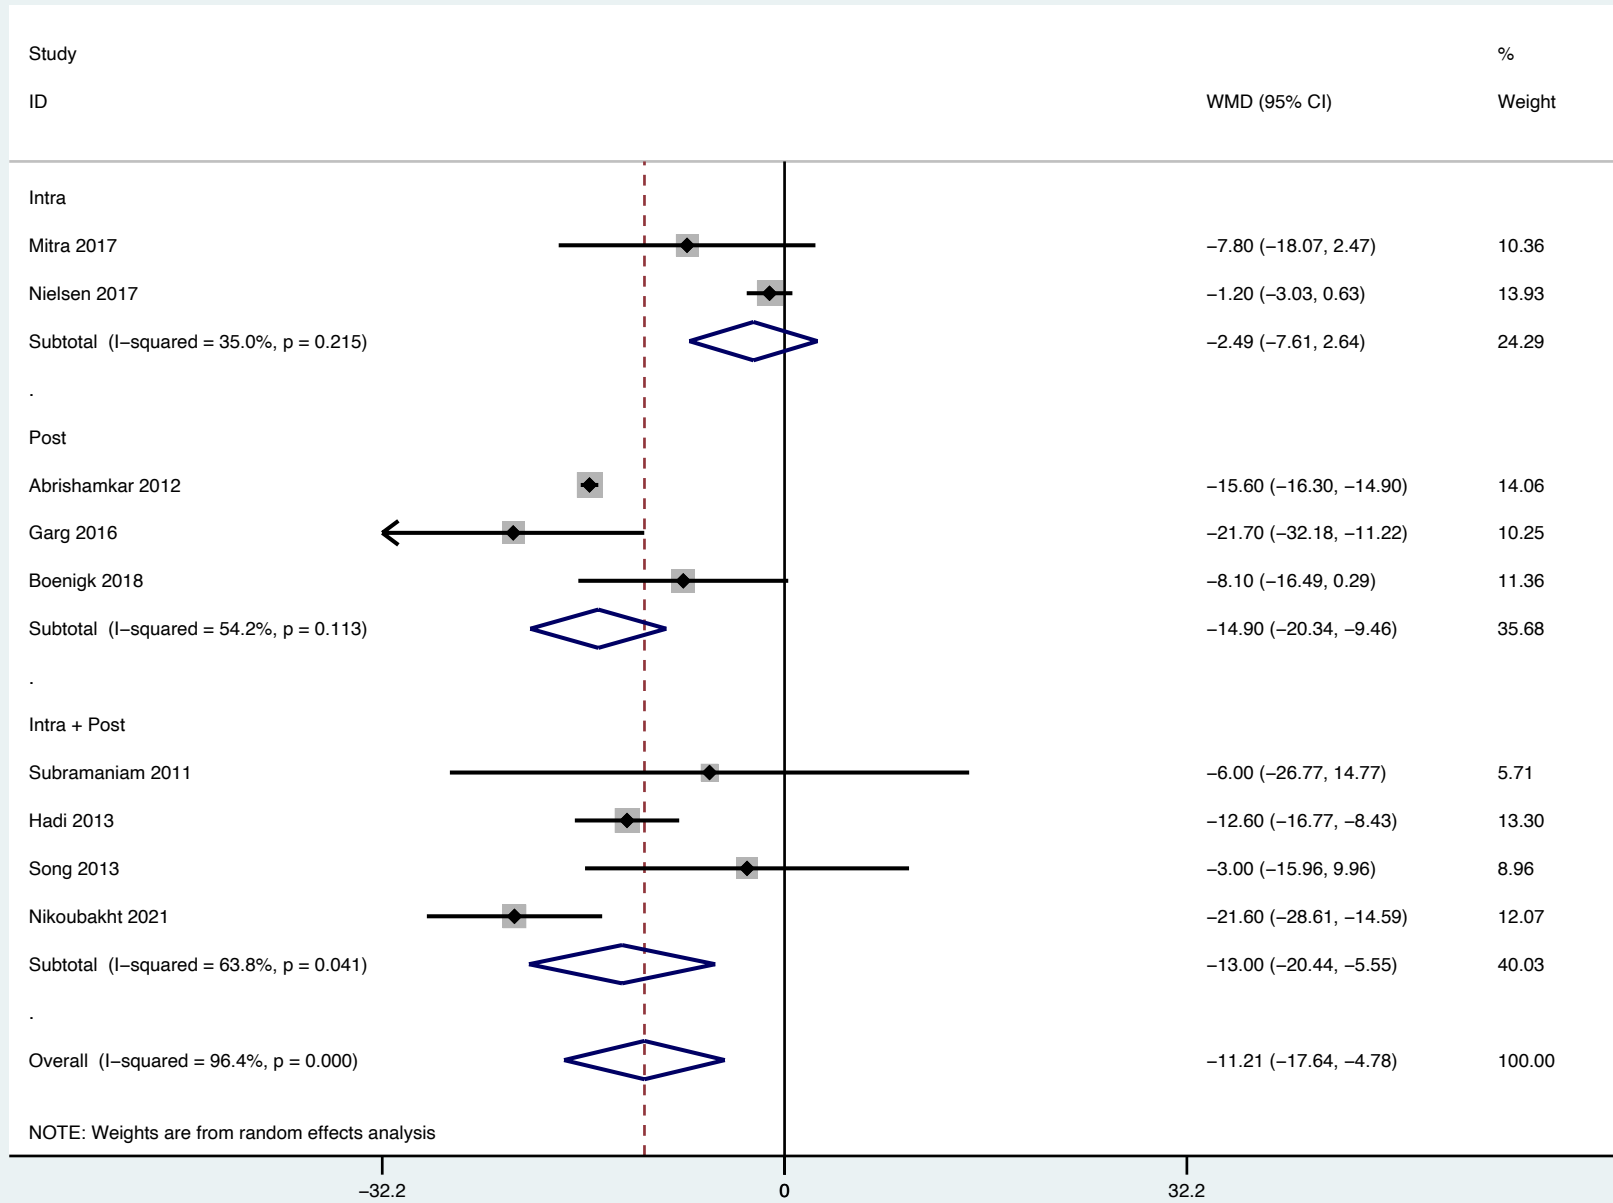

**Figure 10.** Subgroup analysis of pain intensity at rest at 12 h postoperatively by administration times

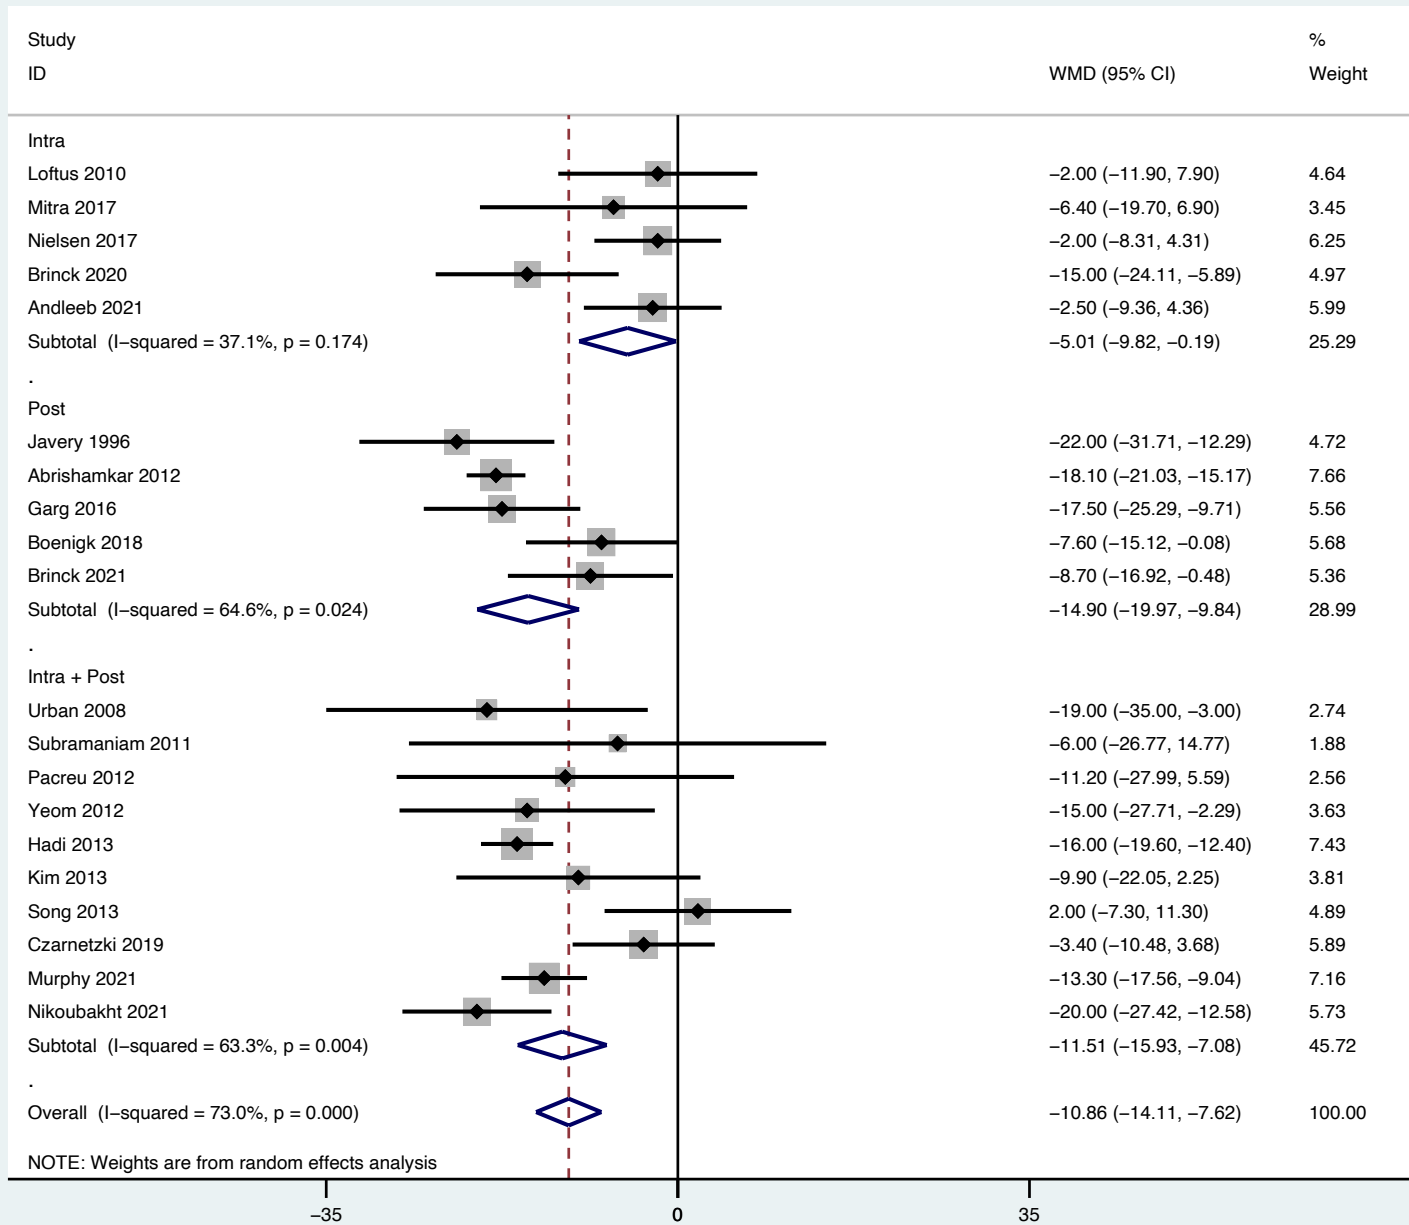

**Figure 11.** Subgroup analysis of pain intensity at rest at 24 h postoperatively by administration times

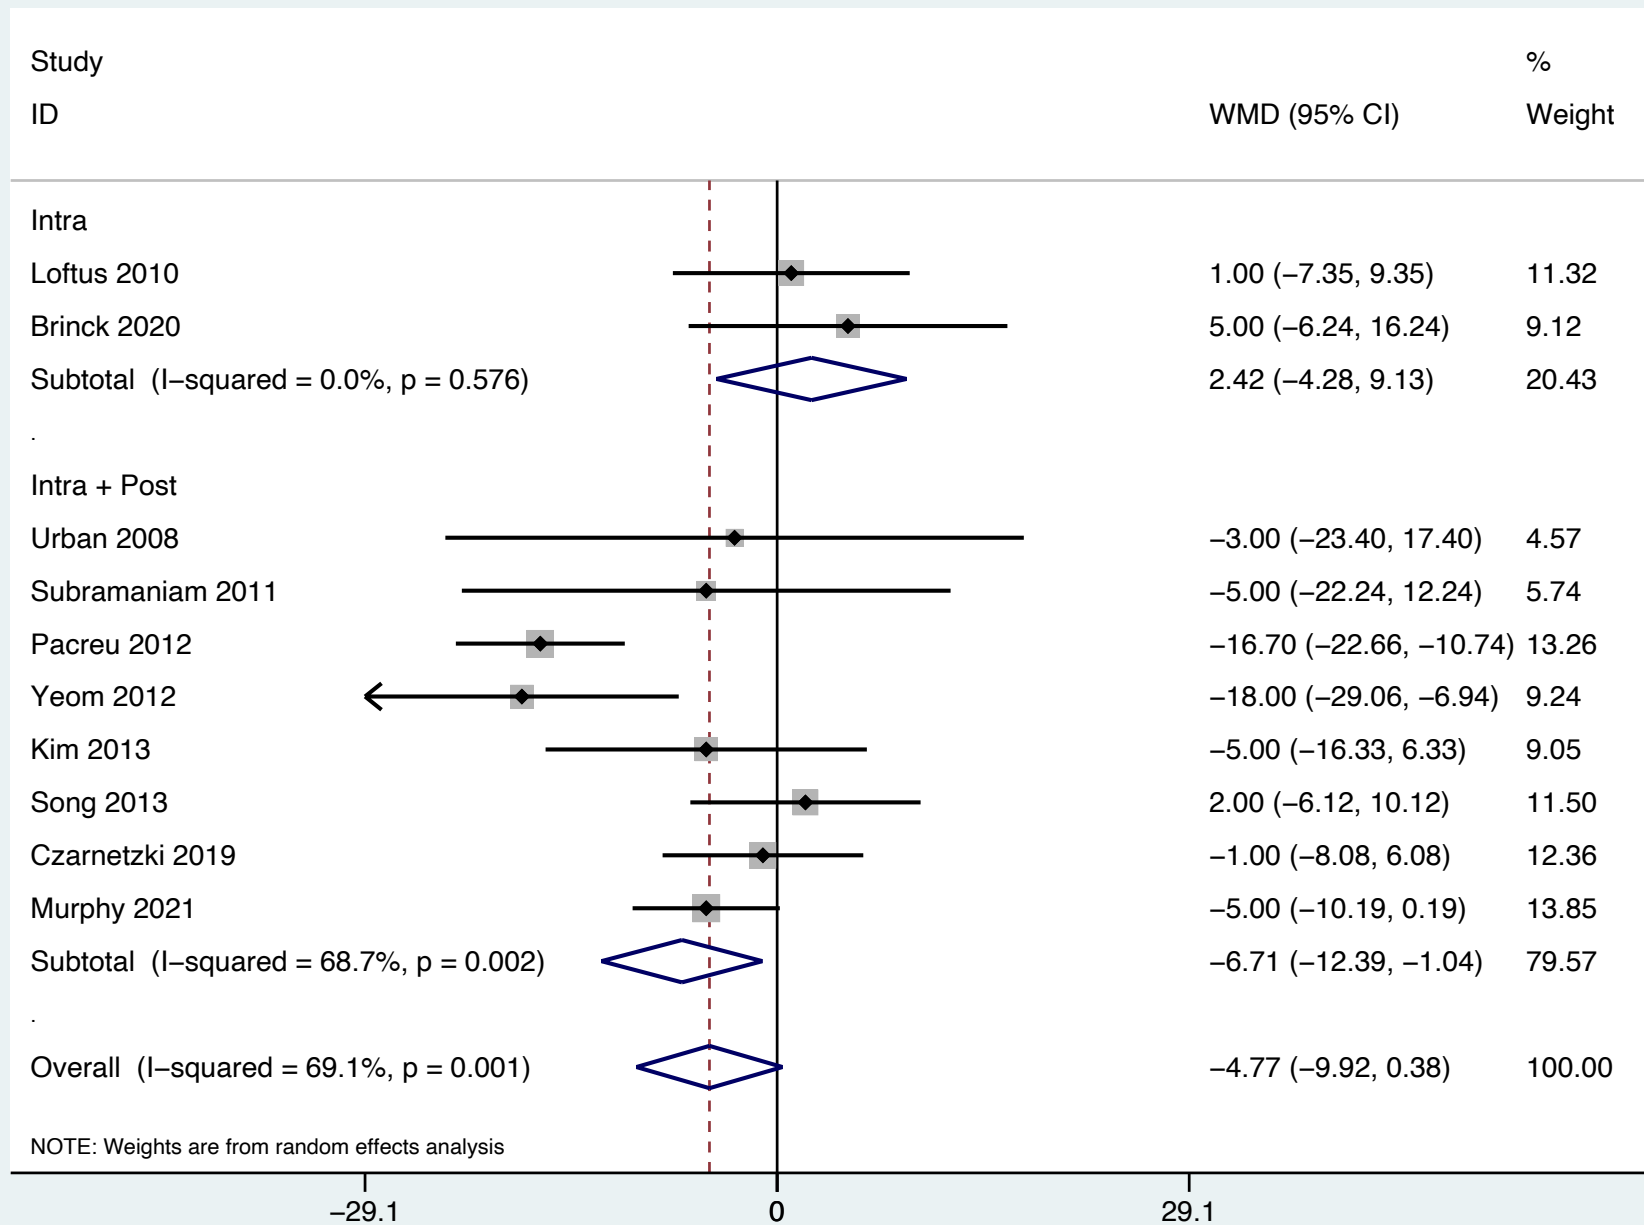

**Figure 12.** Subgroup analysis of pain intensity at rest at 48 h postoperatively by administration times

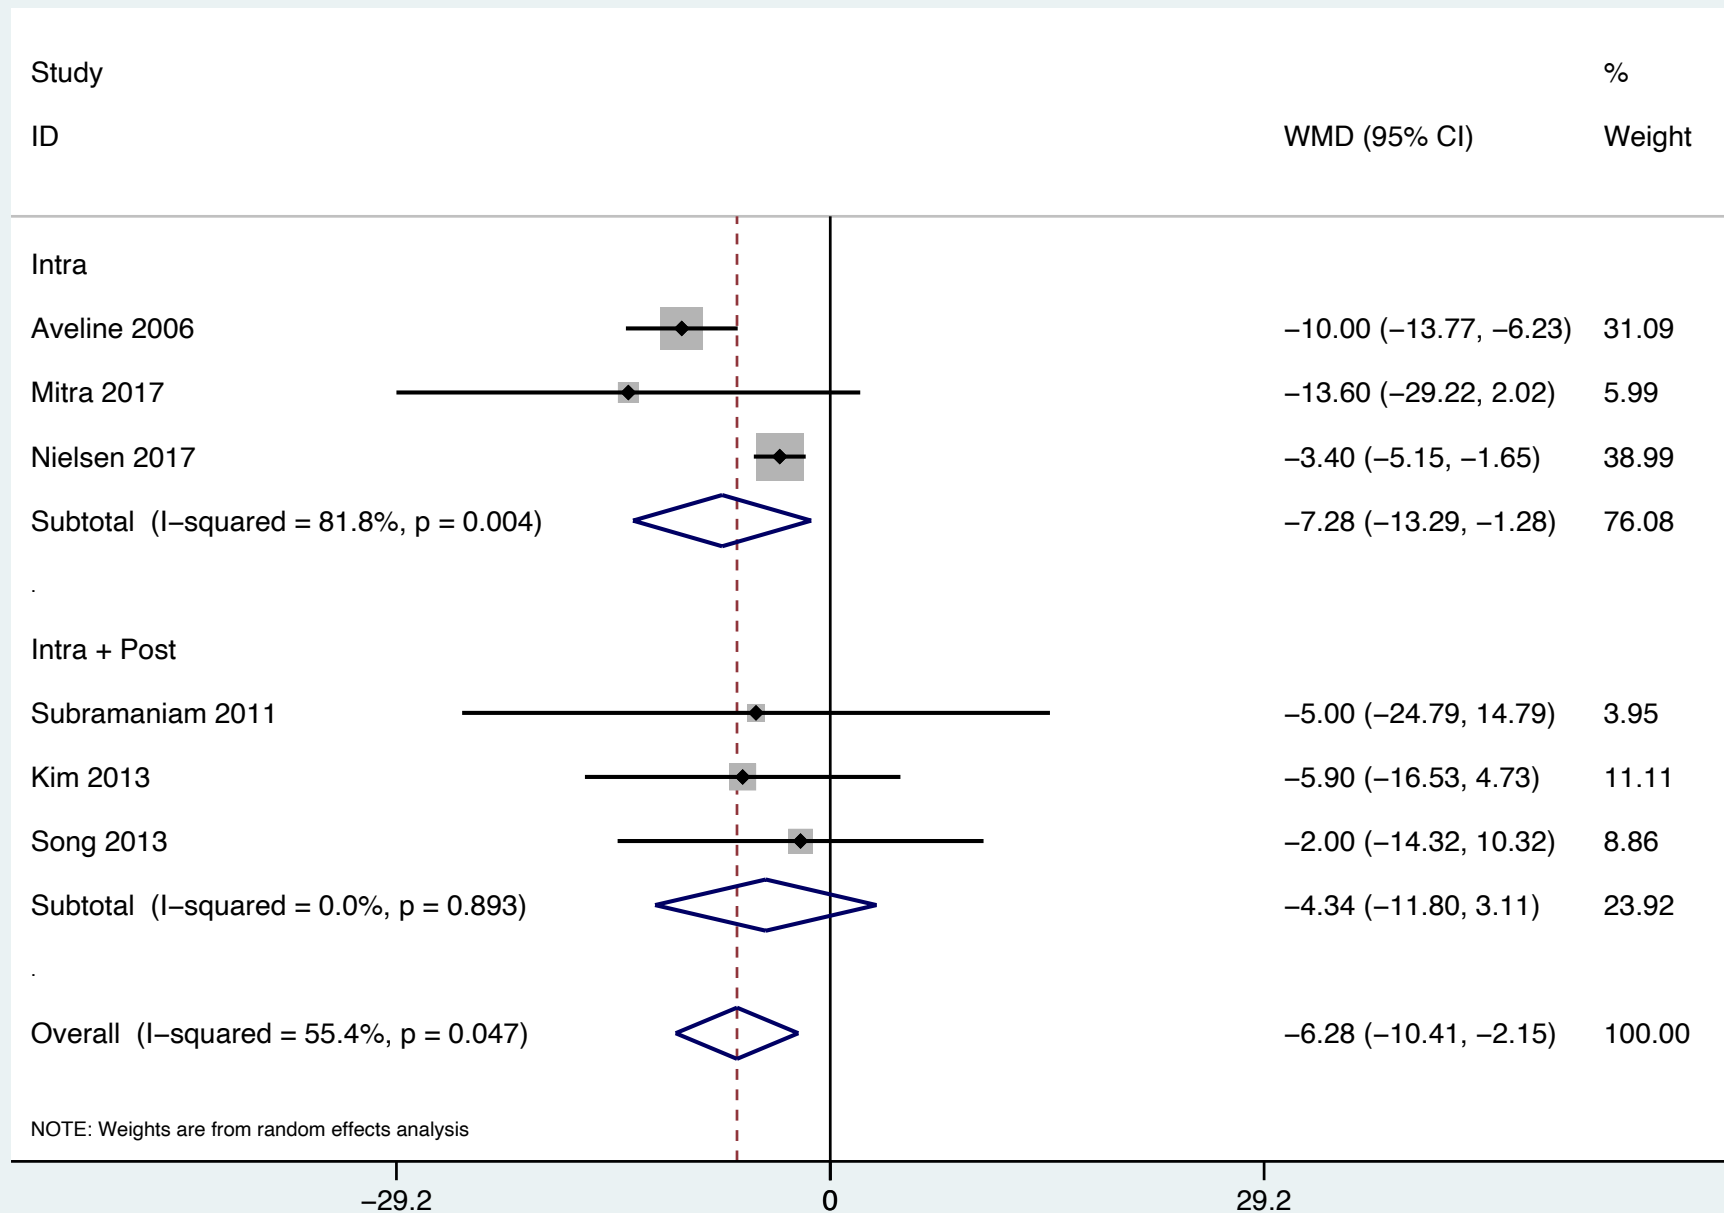

**Figure 13.** Subgroup analysis of pain intensity during mobilization at 6 h postoperatively by administration times

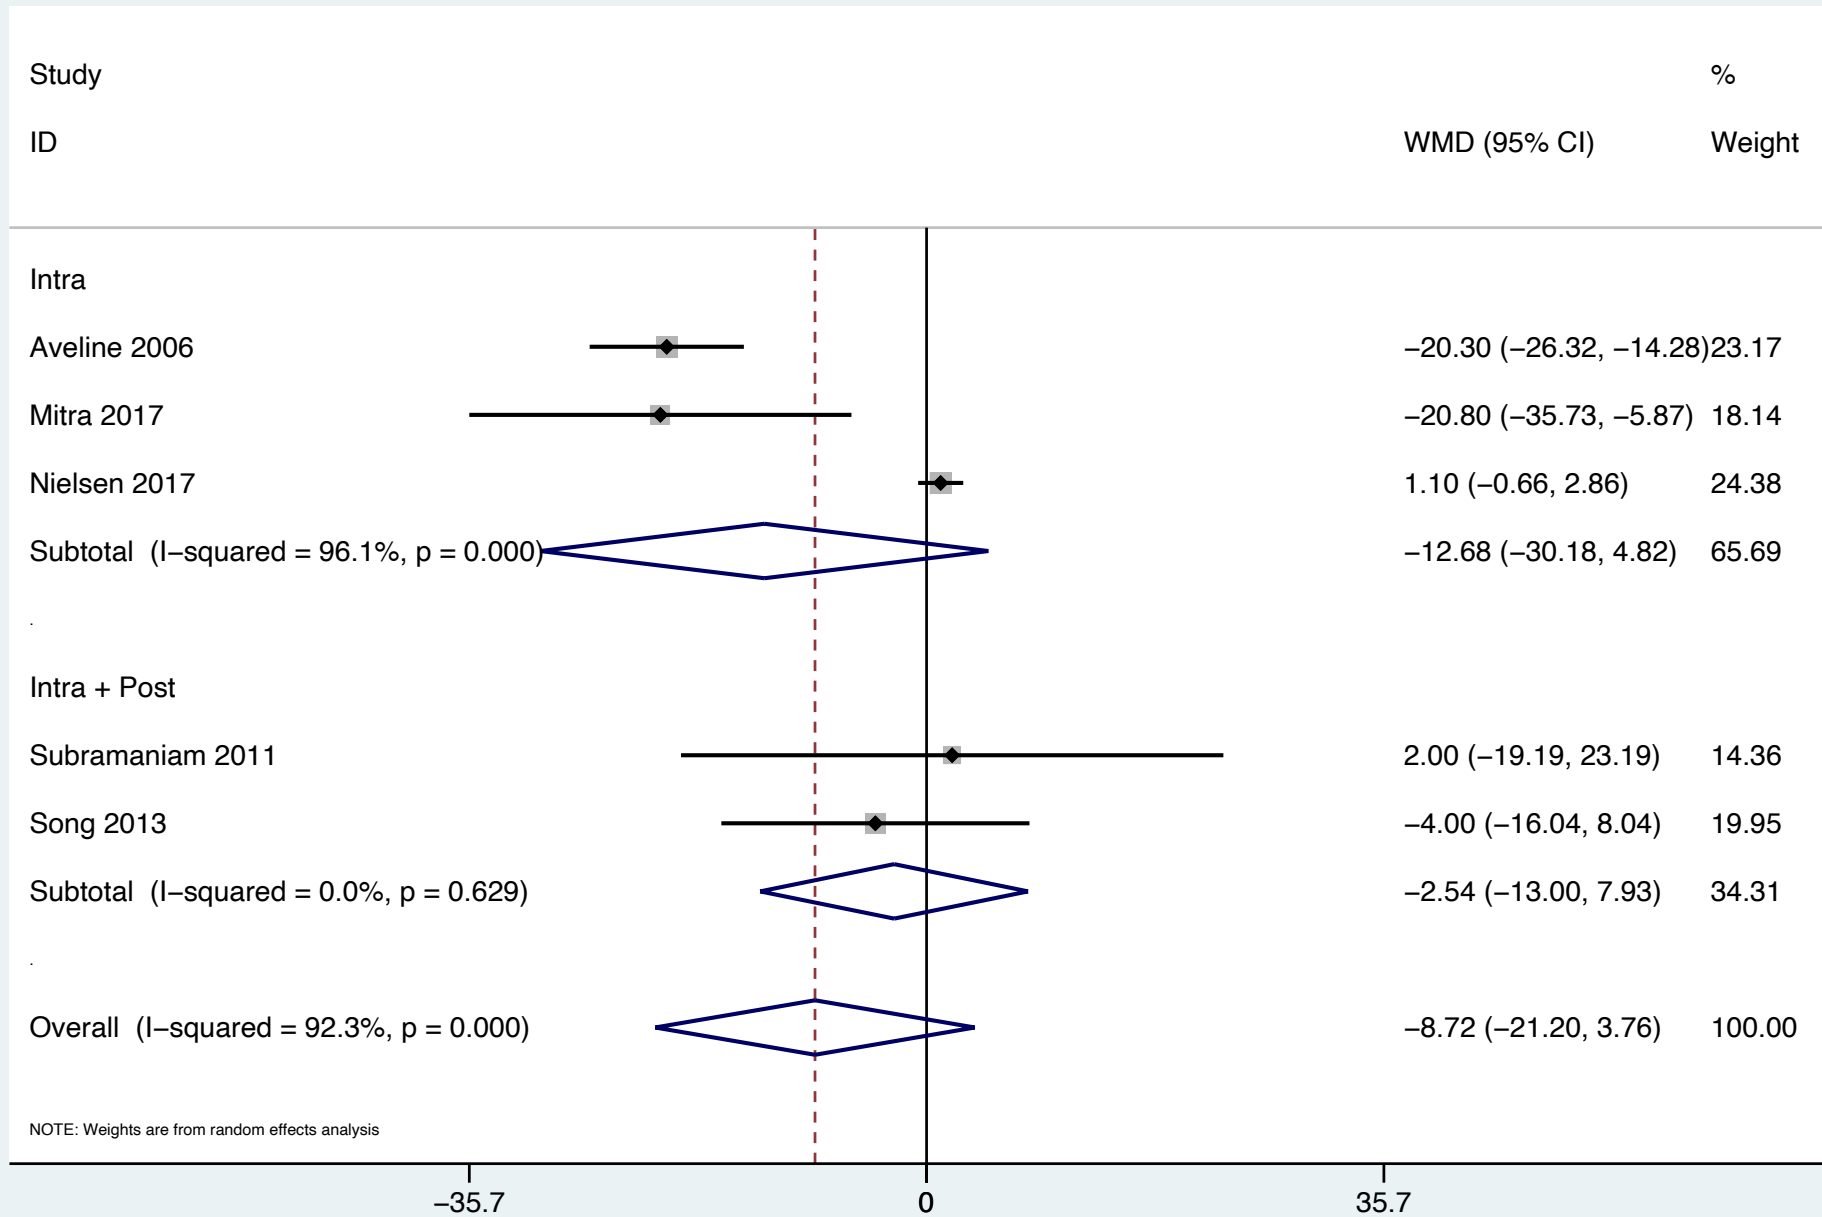

**Figure 14.** Subgroup analysis of pain intensity during mobilization at 12 h postoperatively by administration times

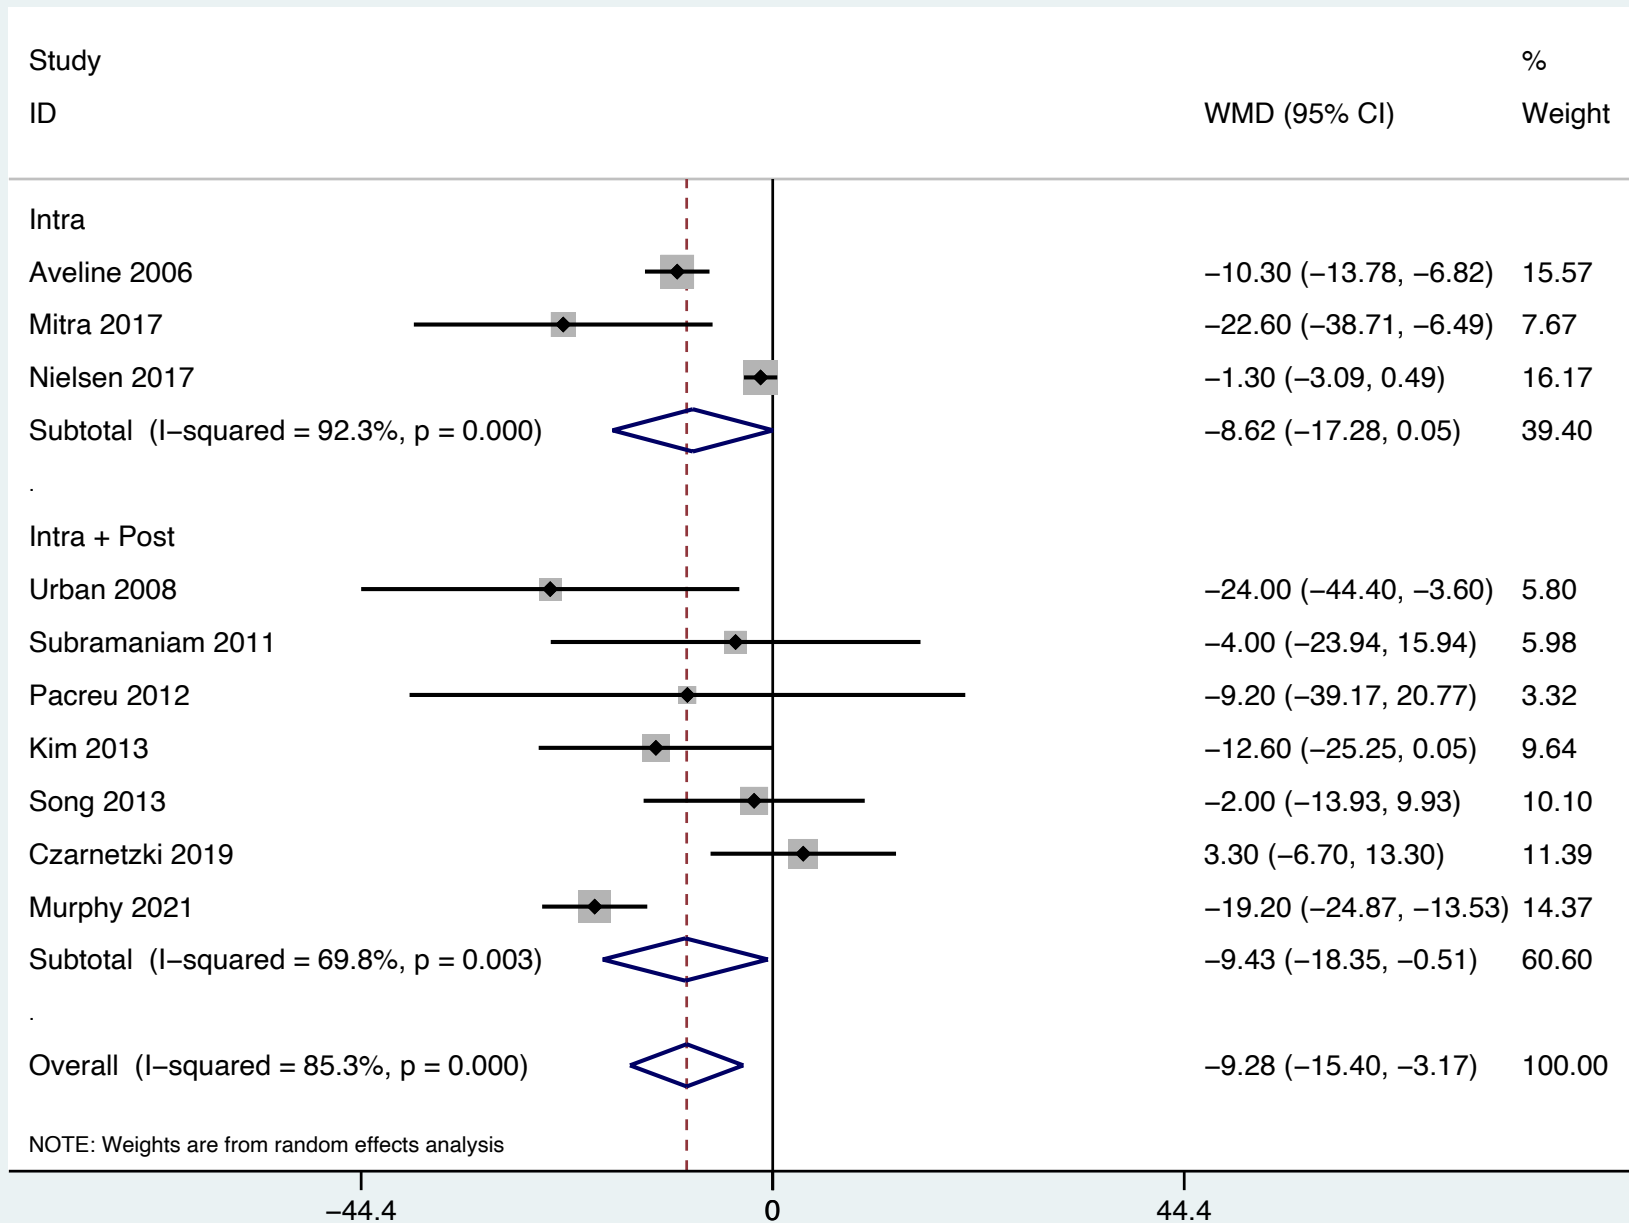

**Figure 15.** Subgroup analysis of pain intensity during mobilization at 24 h postoperatively by administration times

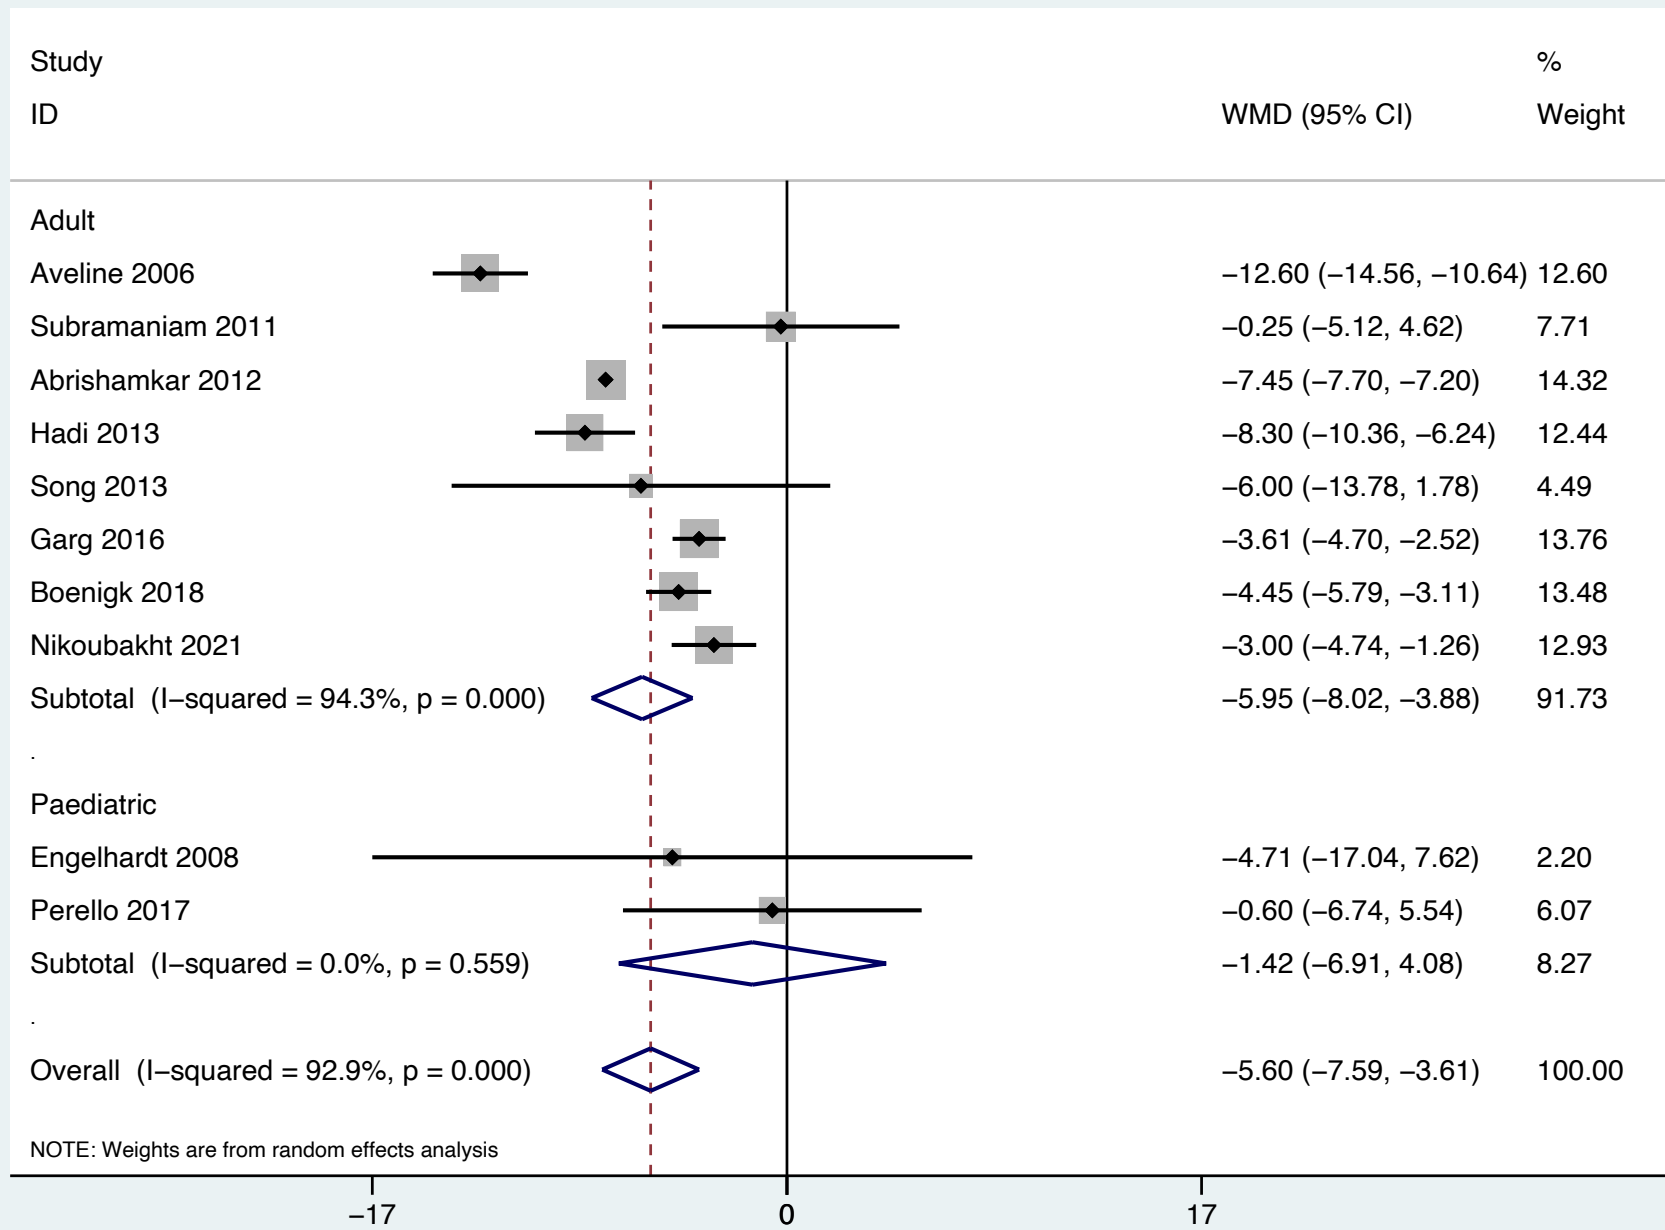

**Figure 16.** Subgroup analysis of cumulative opioid consumption in the first 12 h postoperatively by ages



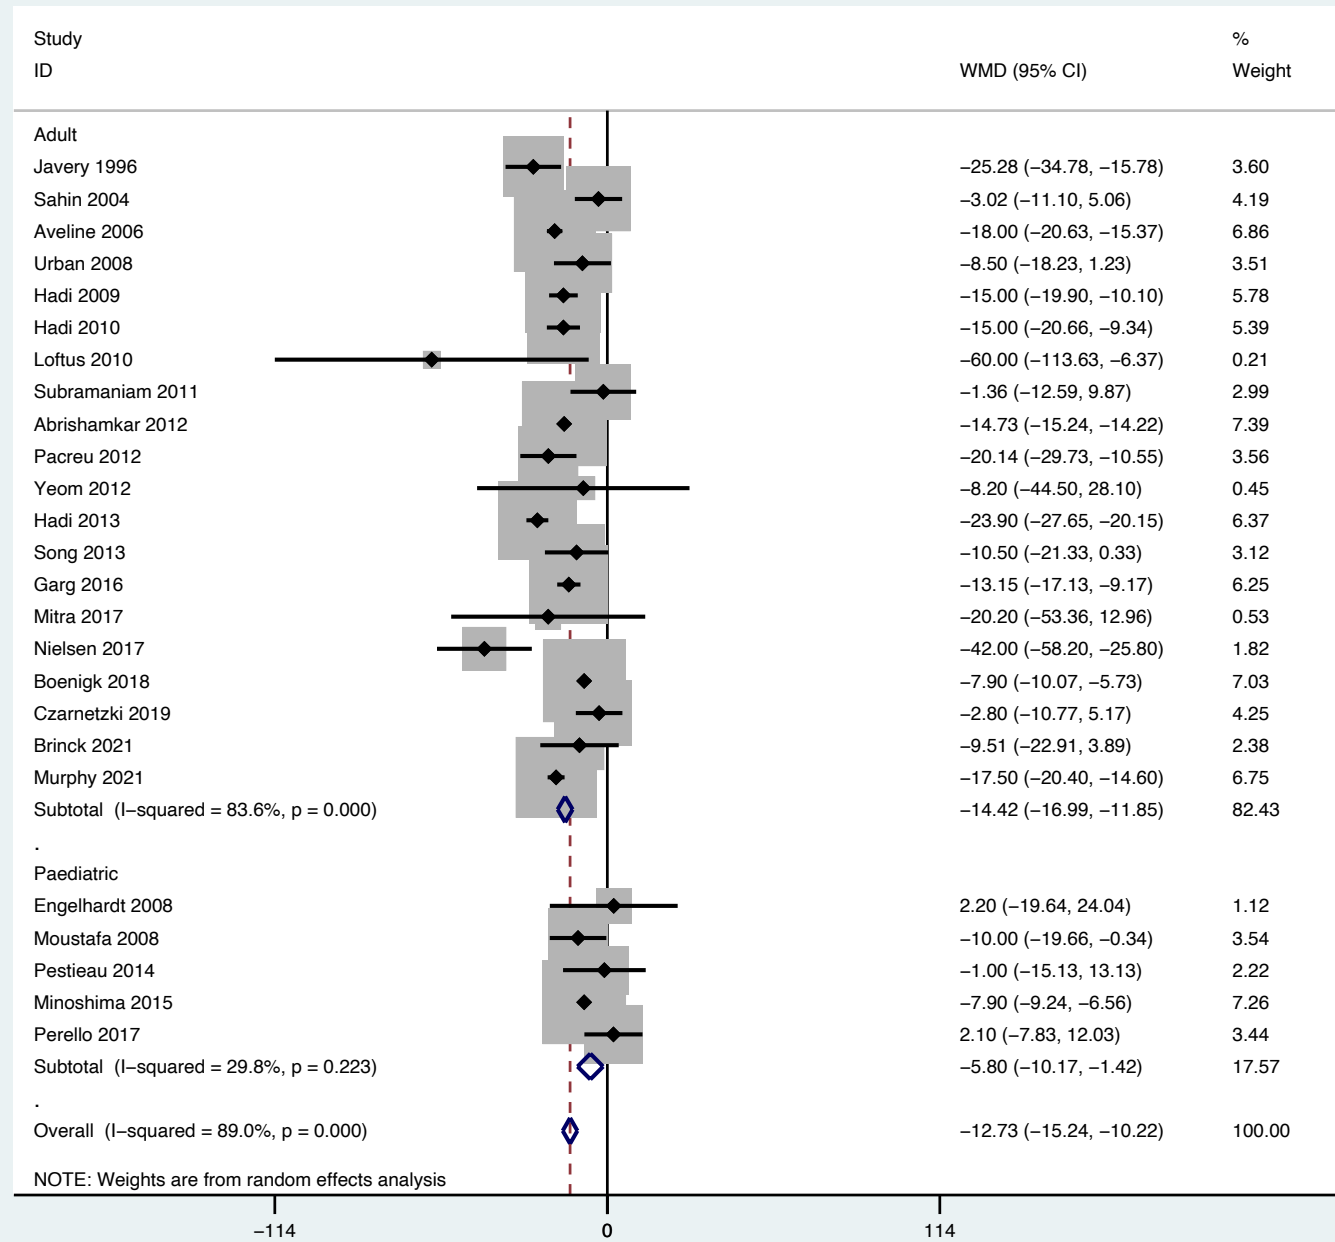

**Figure 17.** Subgroup analysis of cumulative opioid consumption in the first 24 h postoperatively by ages

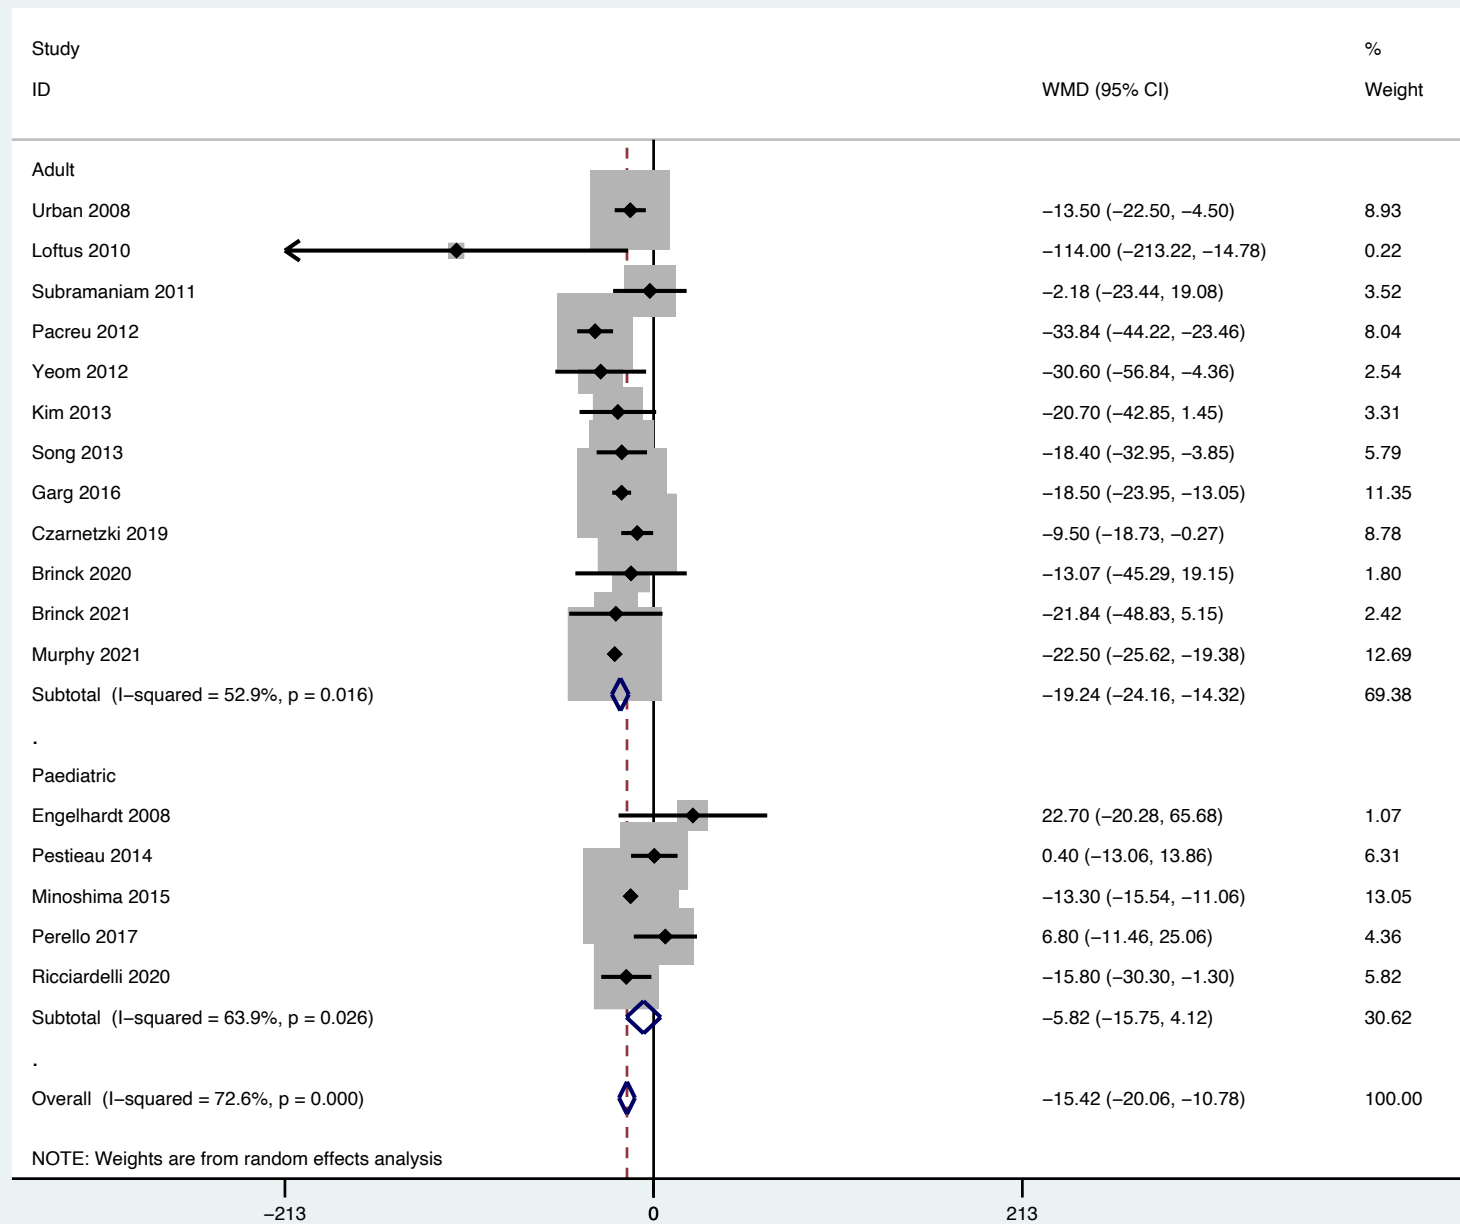

**Figure 18.** Subgroup analysis of cumulative opioid consumption in the first 48 h postoperatively by ages

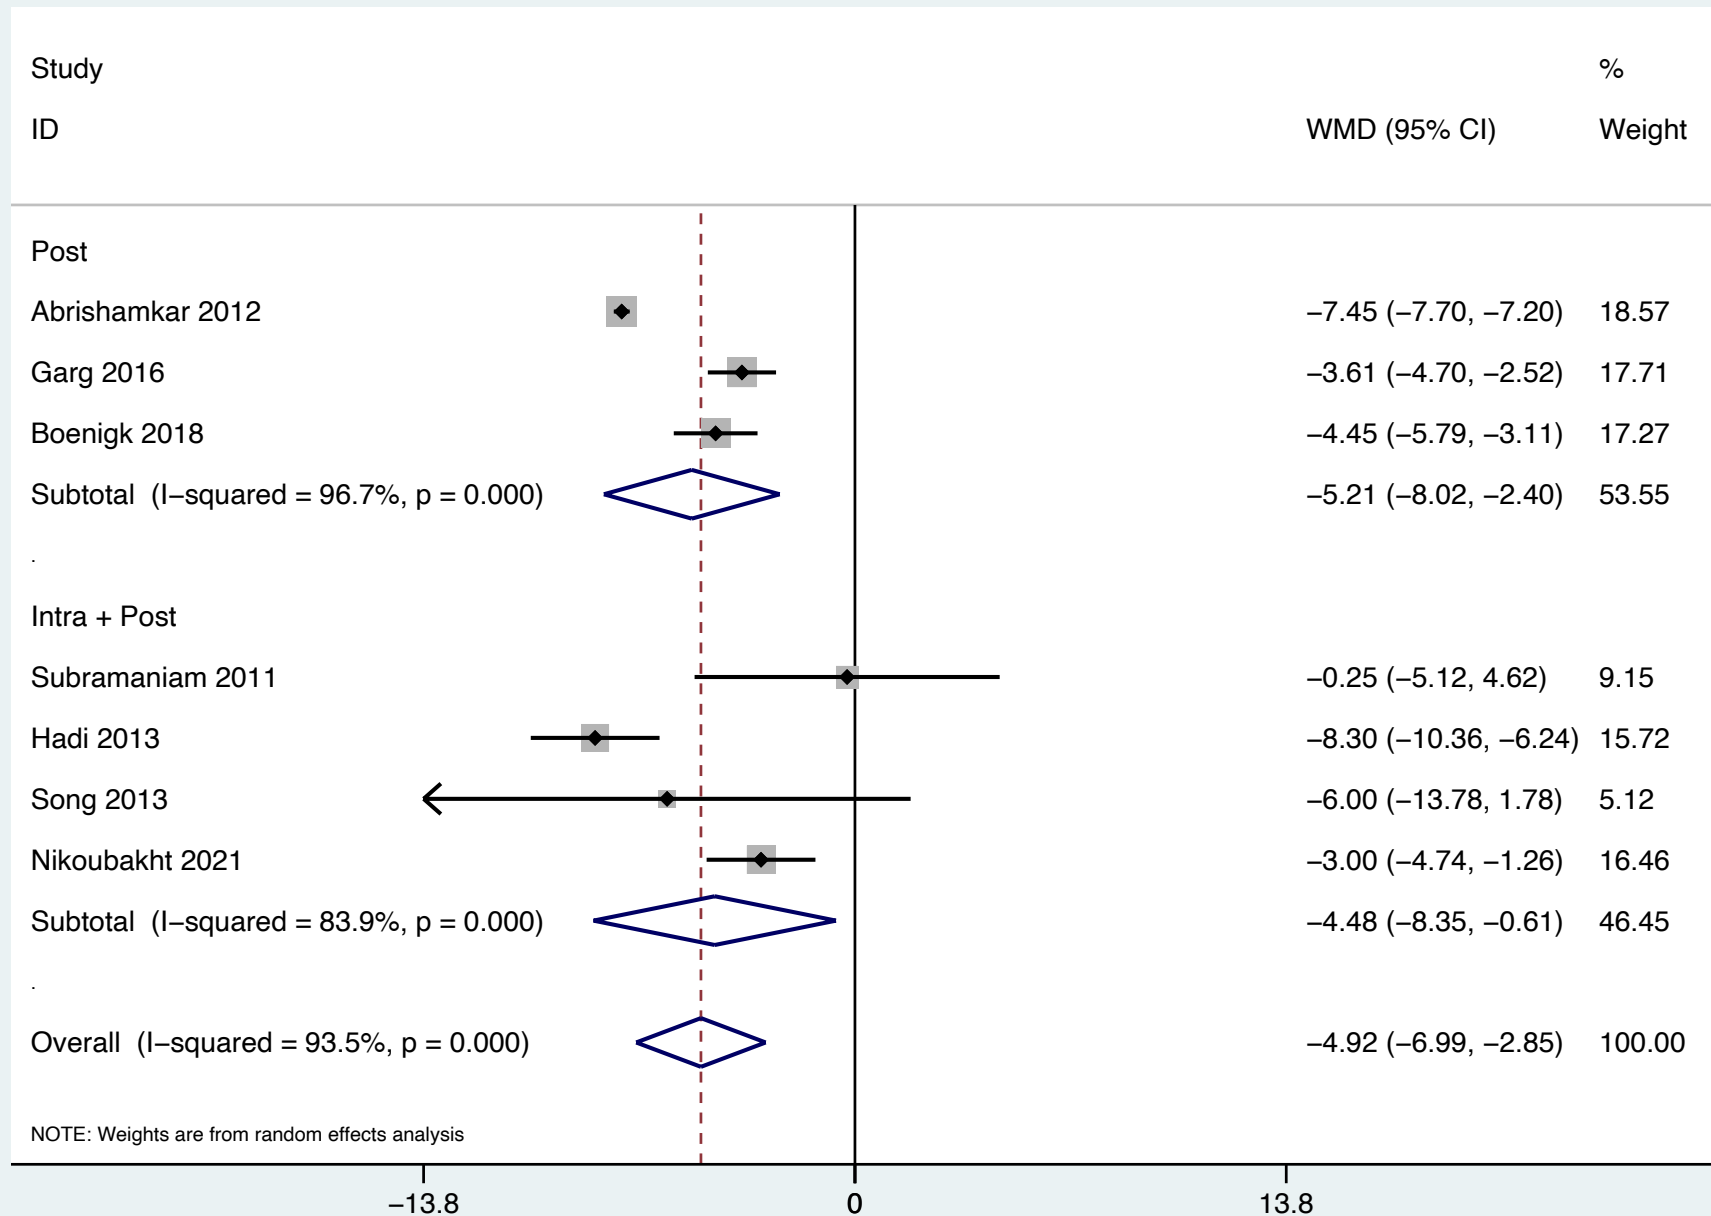

**Figure 19.** Subgroup analysis of cumulative opioid consumption in the first 12 h postoperatively by administration times

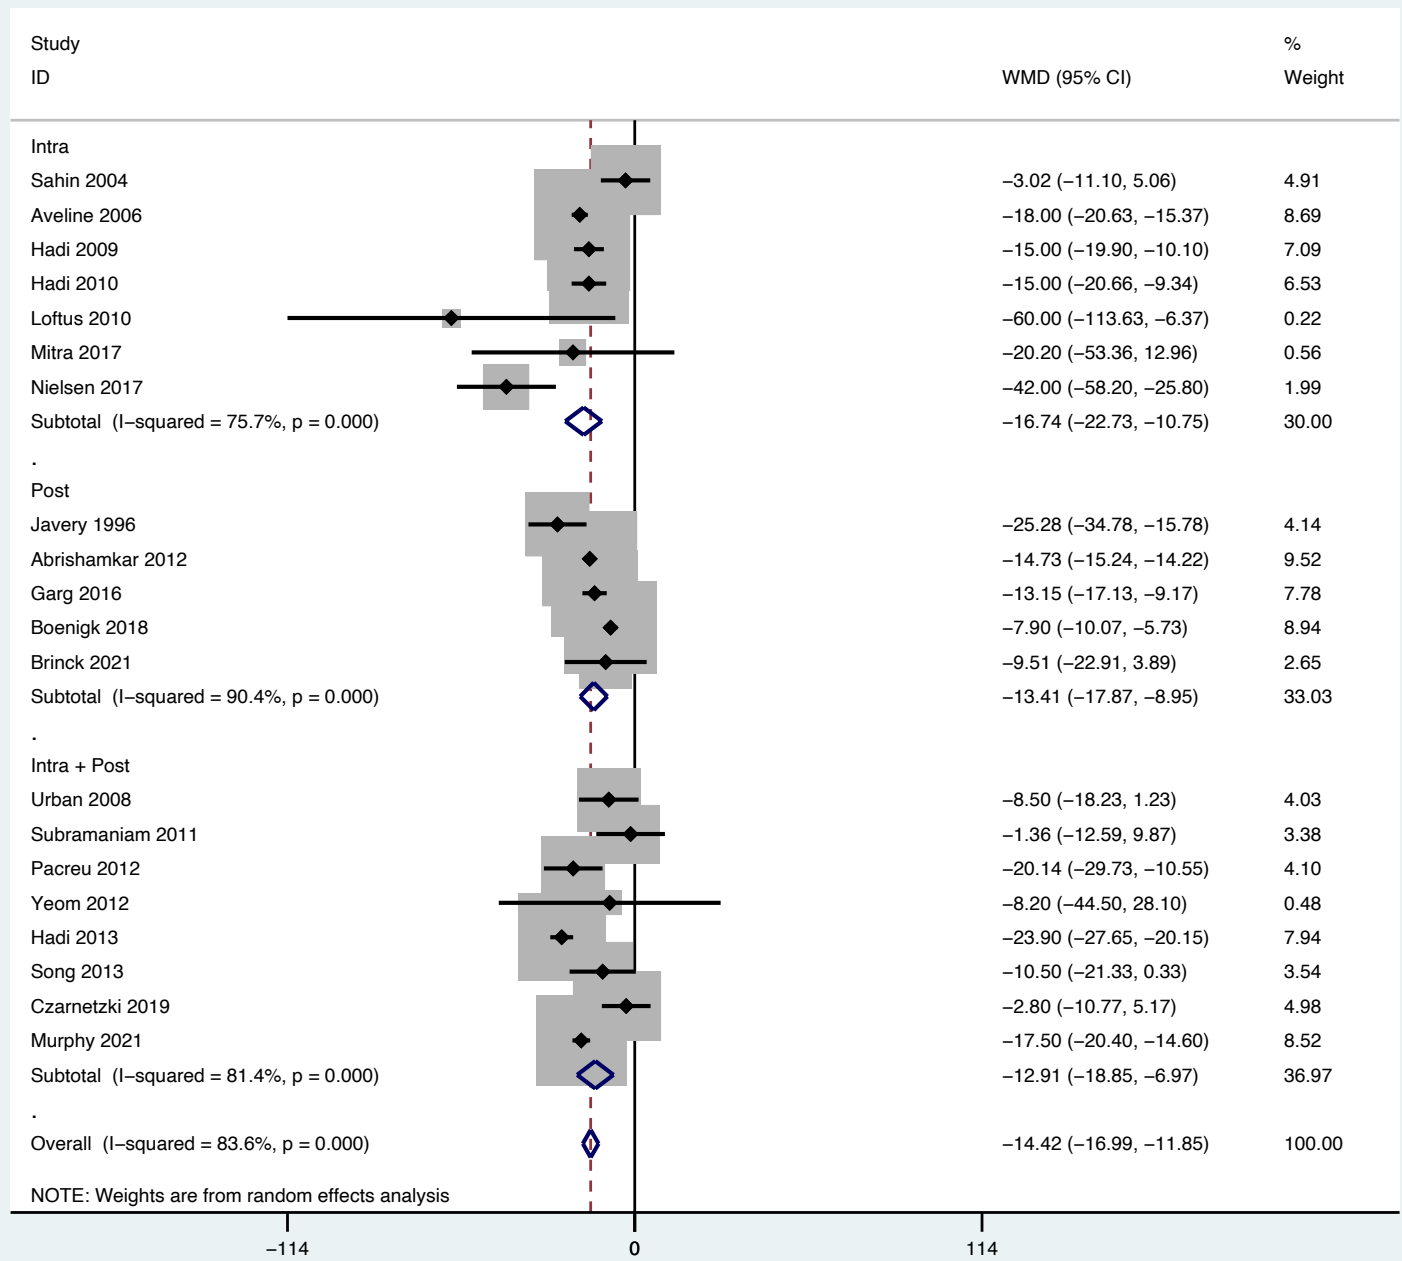

**Figure 20.** Subgroup analysis of cumulative opioid consumption in the first 24 h postoperatively by administration times

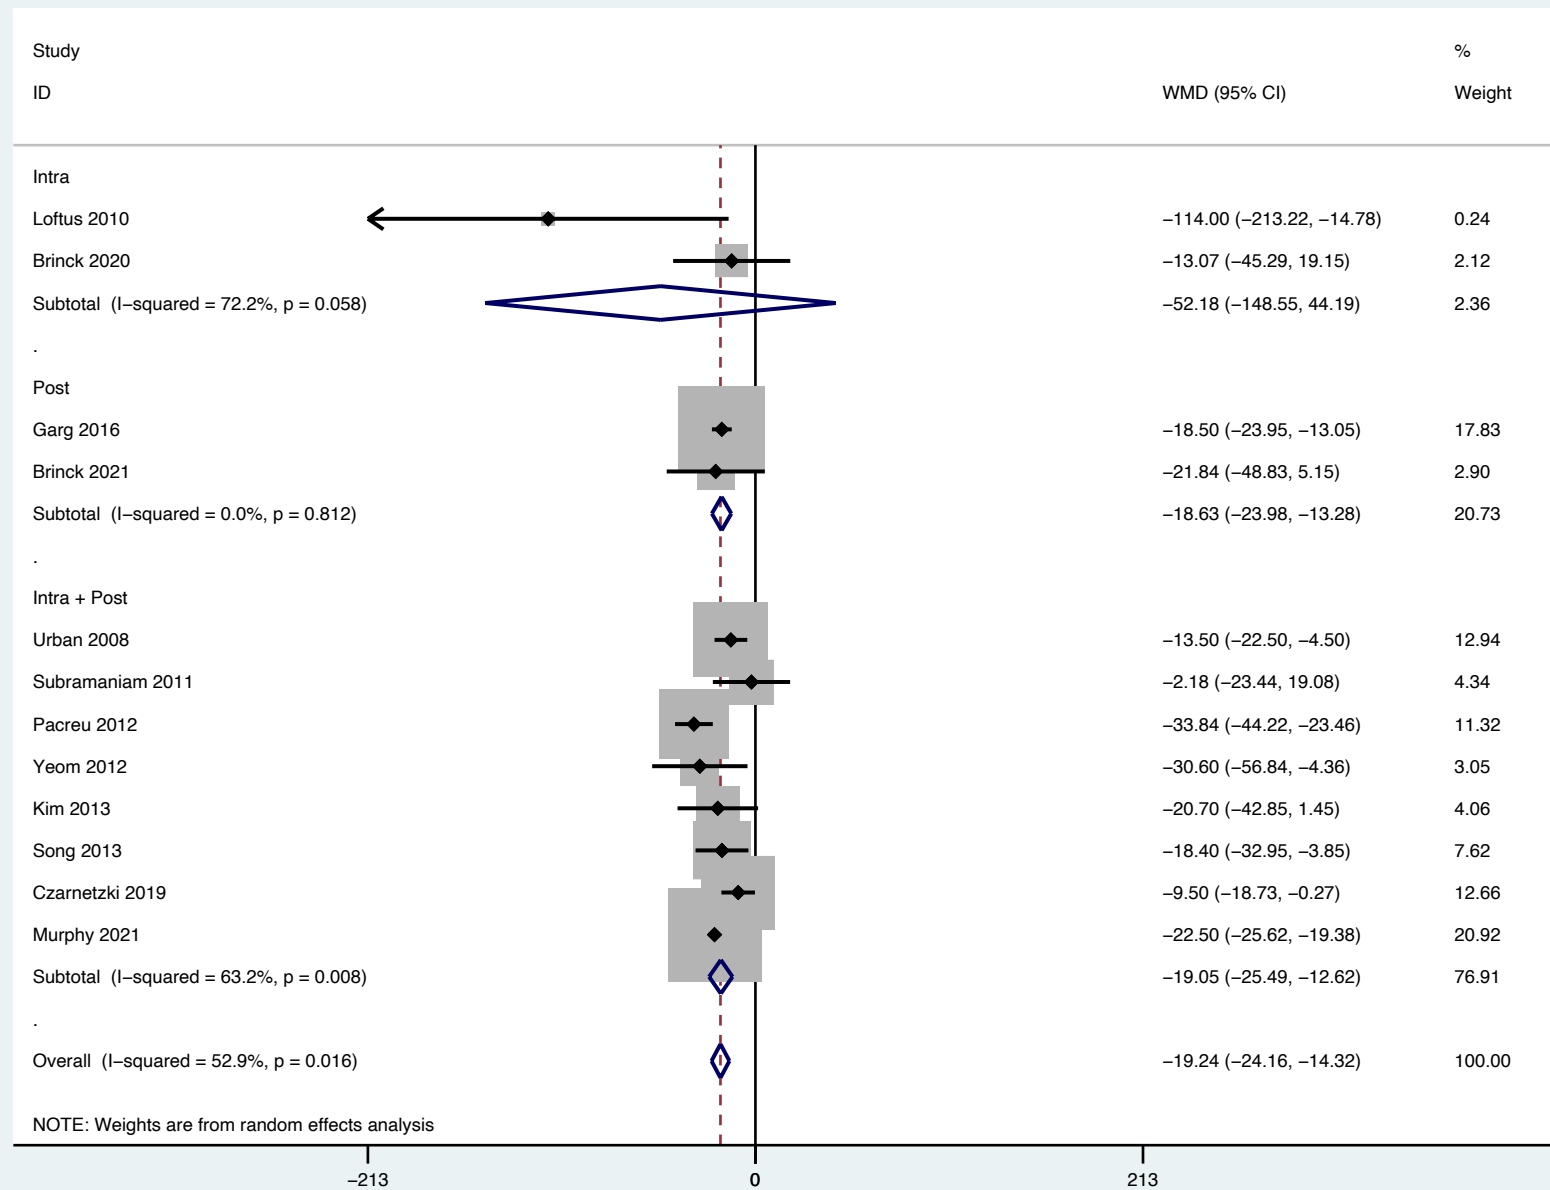

**Figure 21.** Subgroup analysis of cumulative opioid consumption in the first 48 h postoperatively by administration times

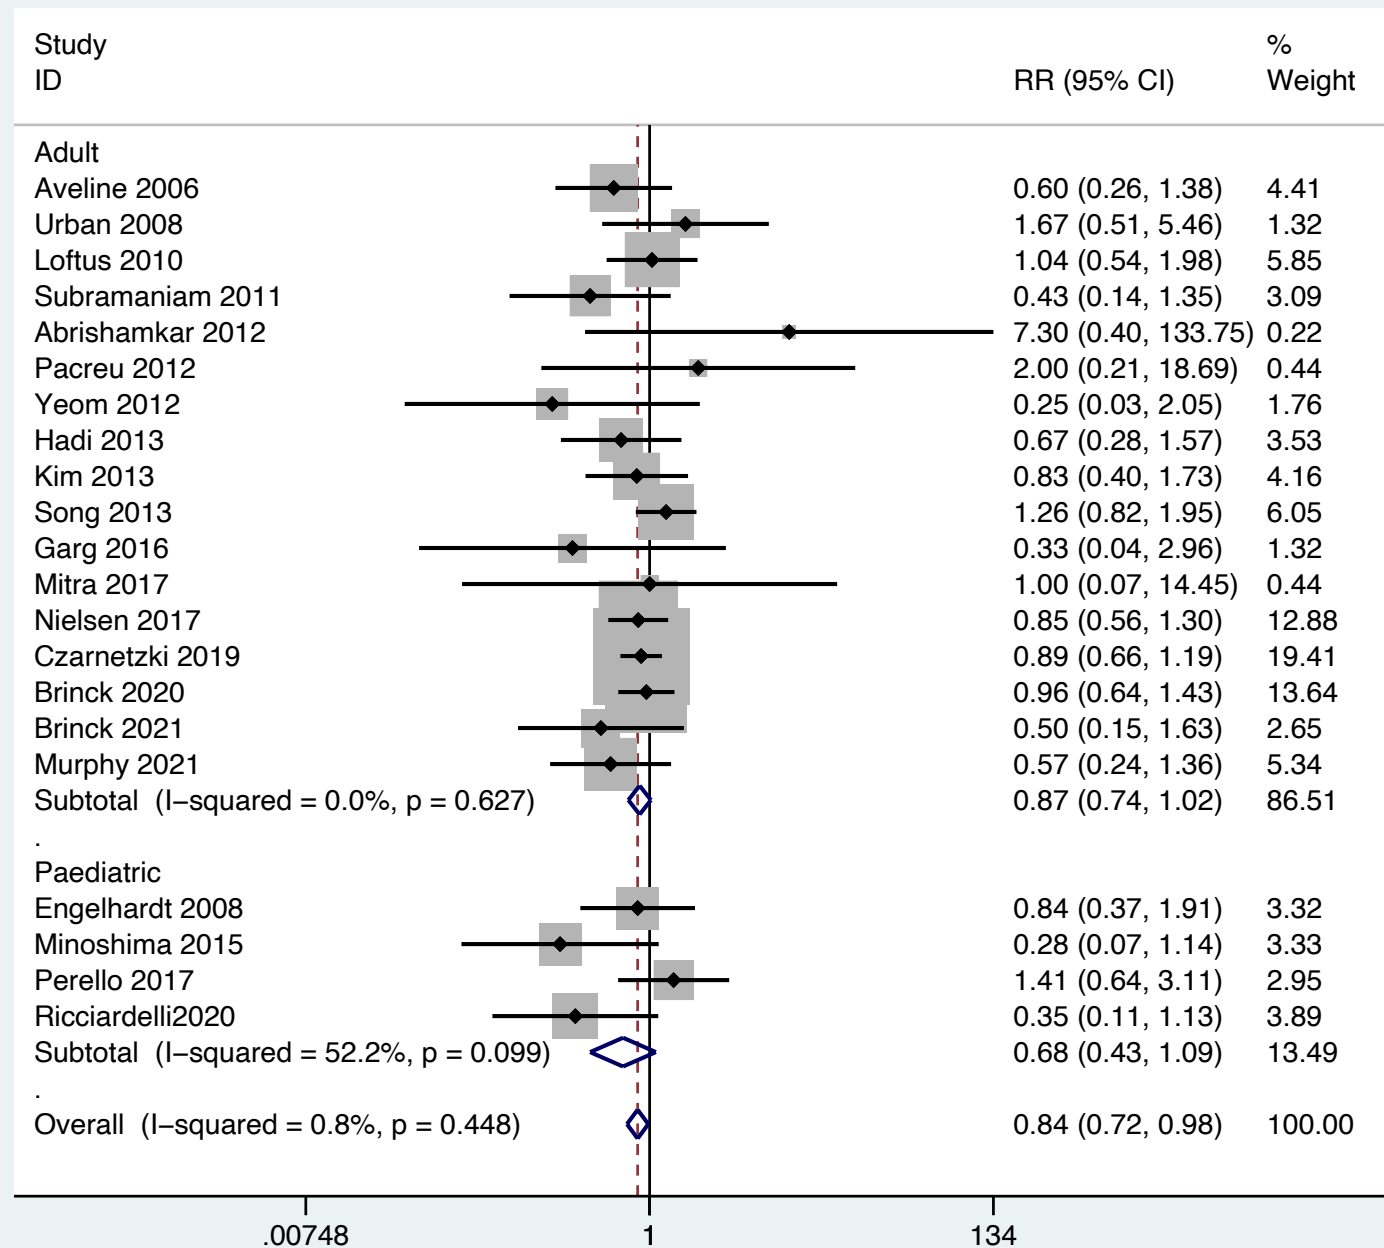

**Figure 22.** Subgroup analysis of the incidence of PONV by ages

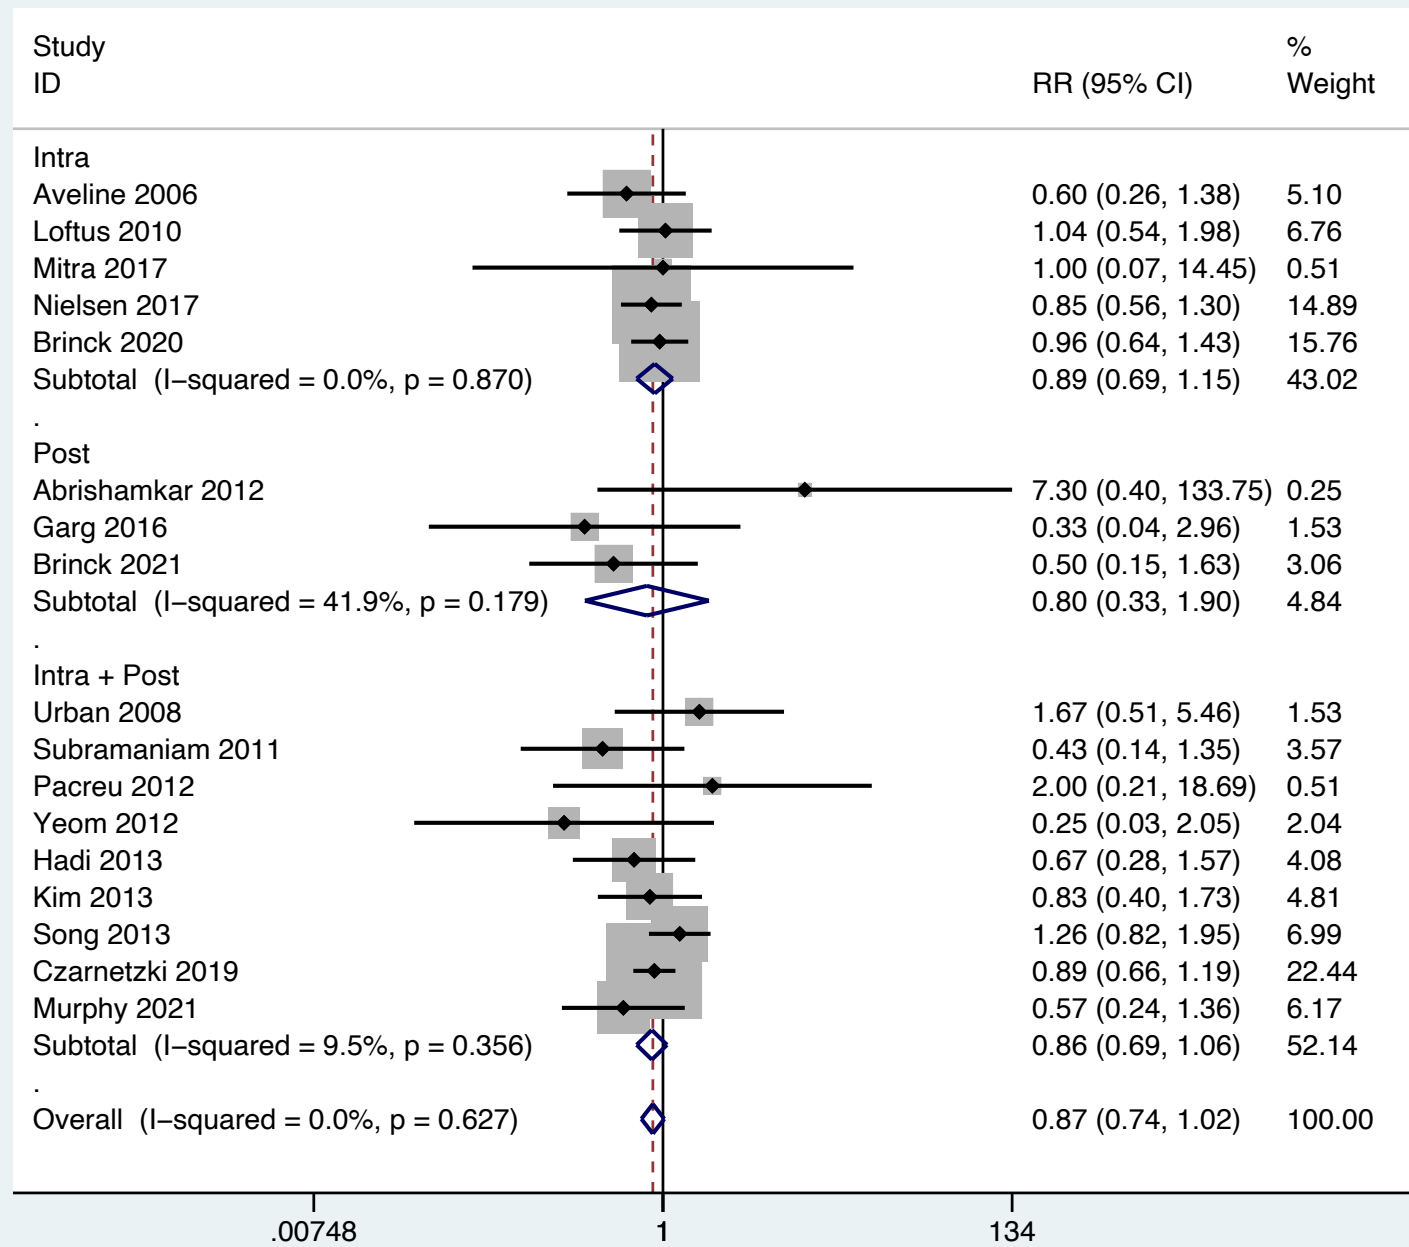

**Figure 23.** Subgroup analysis of the incidence of PONV by administration times
